# Supplementary material for: Parameters Influencing Moisture Diffusion in Epoxy-Based Materials during Hygrothermal Ageing—A Review by Statistical Analysis
Source: MDPI journal article supplement (doi:10.3390/polym14142832), 2022-07-12

**Figure S1.** List of epoxy prepolymers in the study.

| Name and details                            | Chemical structure |
|---------------------------------------------|--------------------|
| <u>DGEBA</u><br>Bisphenol A diglycidylether |                    |
| <u>DGEBF</u><br>Bisphenol F diglycidylether |                    |
| <u>DGEBD</u><br>Butanediol diglycidyl ether |                    |
| <u>ESO</u><br>Epoxidized soybean oil        |                    |
| <u>mTGAP</u><br>m-triglycidylaminophenol    |                    |

| Name and details                                  | Chemical structure                     |
|---------------------------------------------------|----------------------------------------|
| <u>Novolac epoxy</u>                              | Example: Epoxidised cresol novolac<br> |
| <u>Rubber-modified epoxy</u>                      | -                                      |
| <u>TCDAM</u><br>Diaminotetrachlorodiphenylmethane |                                        |
| <u>TGDDM</u><br>Tetraglycidyl methylenedianiline  |                                        |

**Figure S2.** List of hardeners in the study (1/2).

| Group                 | Name and details                    | Chemical structure | Group           | Name and details                                    | Chemical structure |
|-----------------------|-------------------------------------|--------------------|-----------------|-----------------------------------------------------|--------------------|
| Aliphatic amines      | <u>DETA</u><br>Diethylenetriamine   |                    | Aromatic amines | <u>DDS</u><br>Diaminodiphenylsulfone                |                    |
|                       | <u>TETA</u><br>Triethylenetetramine |                    |                 | <u>DDM</u><br>Diaminodiphenylmethane                |                    |
|                       | <u>EDA</u><br>Ethylene diamine      |                    |                 | <u>MPD</u><br>Diaminobenzene                        |                    |
|                       | <u>Polyoxypropylenediamine</u>      |                    |                 | <u>MDEA</u><br>Methylenebisdiethylaniline           |                    |
|                       | <u>TAEA</u><br>Trisaminoethylamine  |                    |                 | <u>M-MIPA</u><br>Methylenebisisopropylmethylaniline |                    |
| Cycloaliphatic amines | <u>IPDA</u><br>Isophorone diamine   |                    |                 | <u>Aniline</u>                                      |                    |
|                       | <u>DACH</u><br>Diaminocyclohexane   |                    |                 | <u>DETDA</u><br>Diethyltoluenediamine               |                    |
|                       | <u>Aminoimidazoline</u>             |                    |                 | <u>mPDA</u><br>Metaphenylenediamine                 |                    |
|                       |                                     |                    |                 | <u>POEA</u><br>Polyoxyalkyleneamine                 |                    |
|                       |                                     |                    |                 | <u>Xylylene amine</u>                               |                    |

**Figure S2.** List of hardeners in the study (2/2).

| Group              | Name and details                                     | Chemical structure                                                                                                          |
|--------------------|------------------------------------------------------|-----------------------------------------------------------------------------------------------------------------------------|
| Anhydride acid     | <u>Dibenzol peroxide</u>                             | 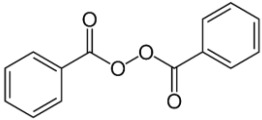                                          |
|                    | <u>MHHPA</u><br>Methyltetrahydrophthalic anhydride   |                                           |
|                    | <u>MNA</u><br>Methylnorbornenedicarboxylic anhydride |                                           |
| Dicyan-<br>diamide | <u>DDA</u><br>Dicyandiamide                          |                                           |
| Amido<br>amine     | <u>Amidoamine</u>                                    | Example: Lauramidopropyldimethylamine<br> |
| Phenol<br>Novolac  | <u>Phenol Novolac</u>                                | Example: Phenol-formaldehyde novolac<br>  |

**Figure S3.** Boxplots of  $D$  as a function of epoxy prepolymer type.

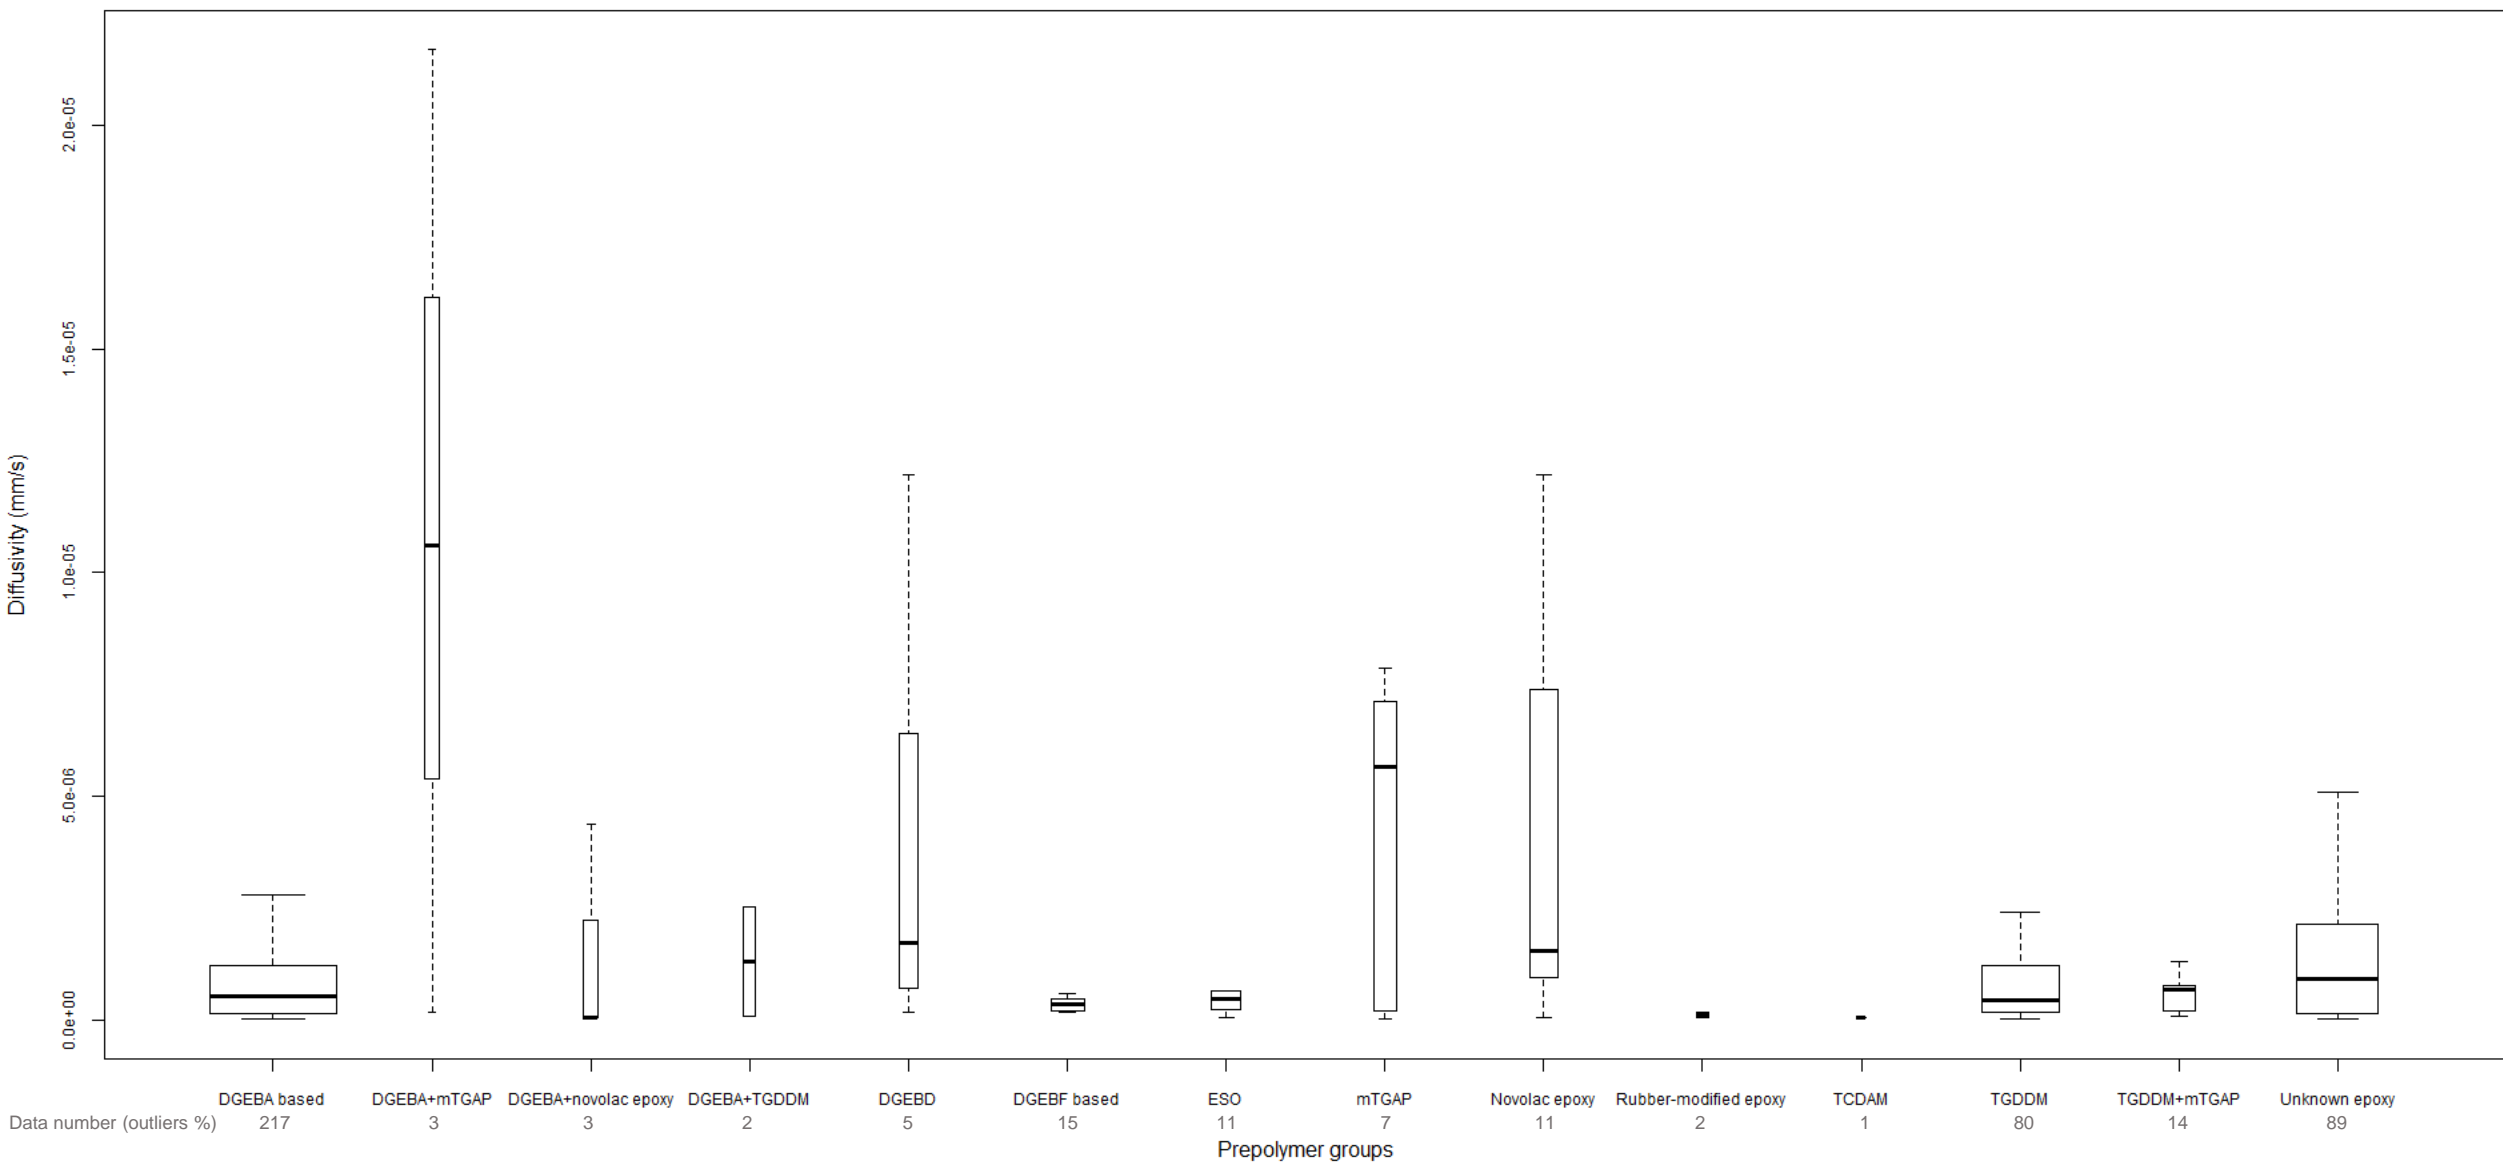

**Figure S4.** Boxplots of  $t_{sat}/h$  as a function of epoxy prepolymer type.

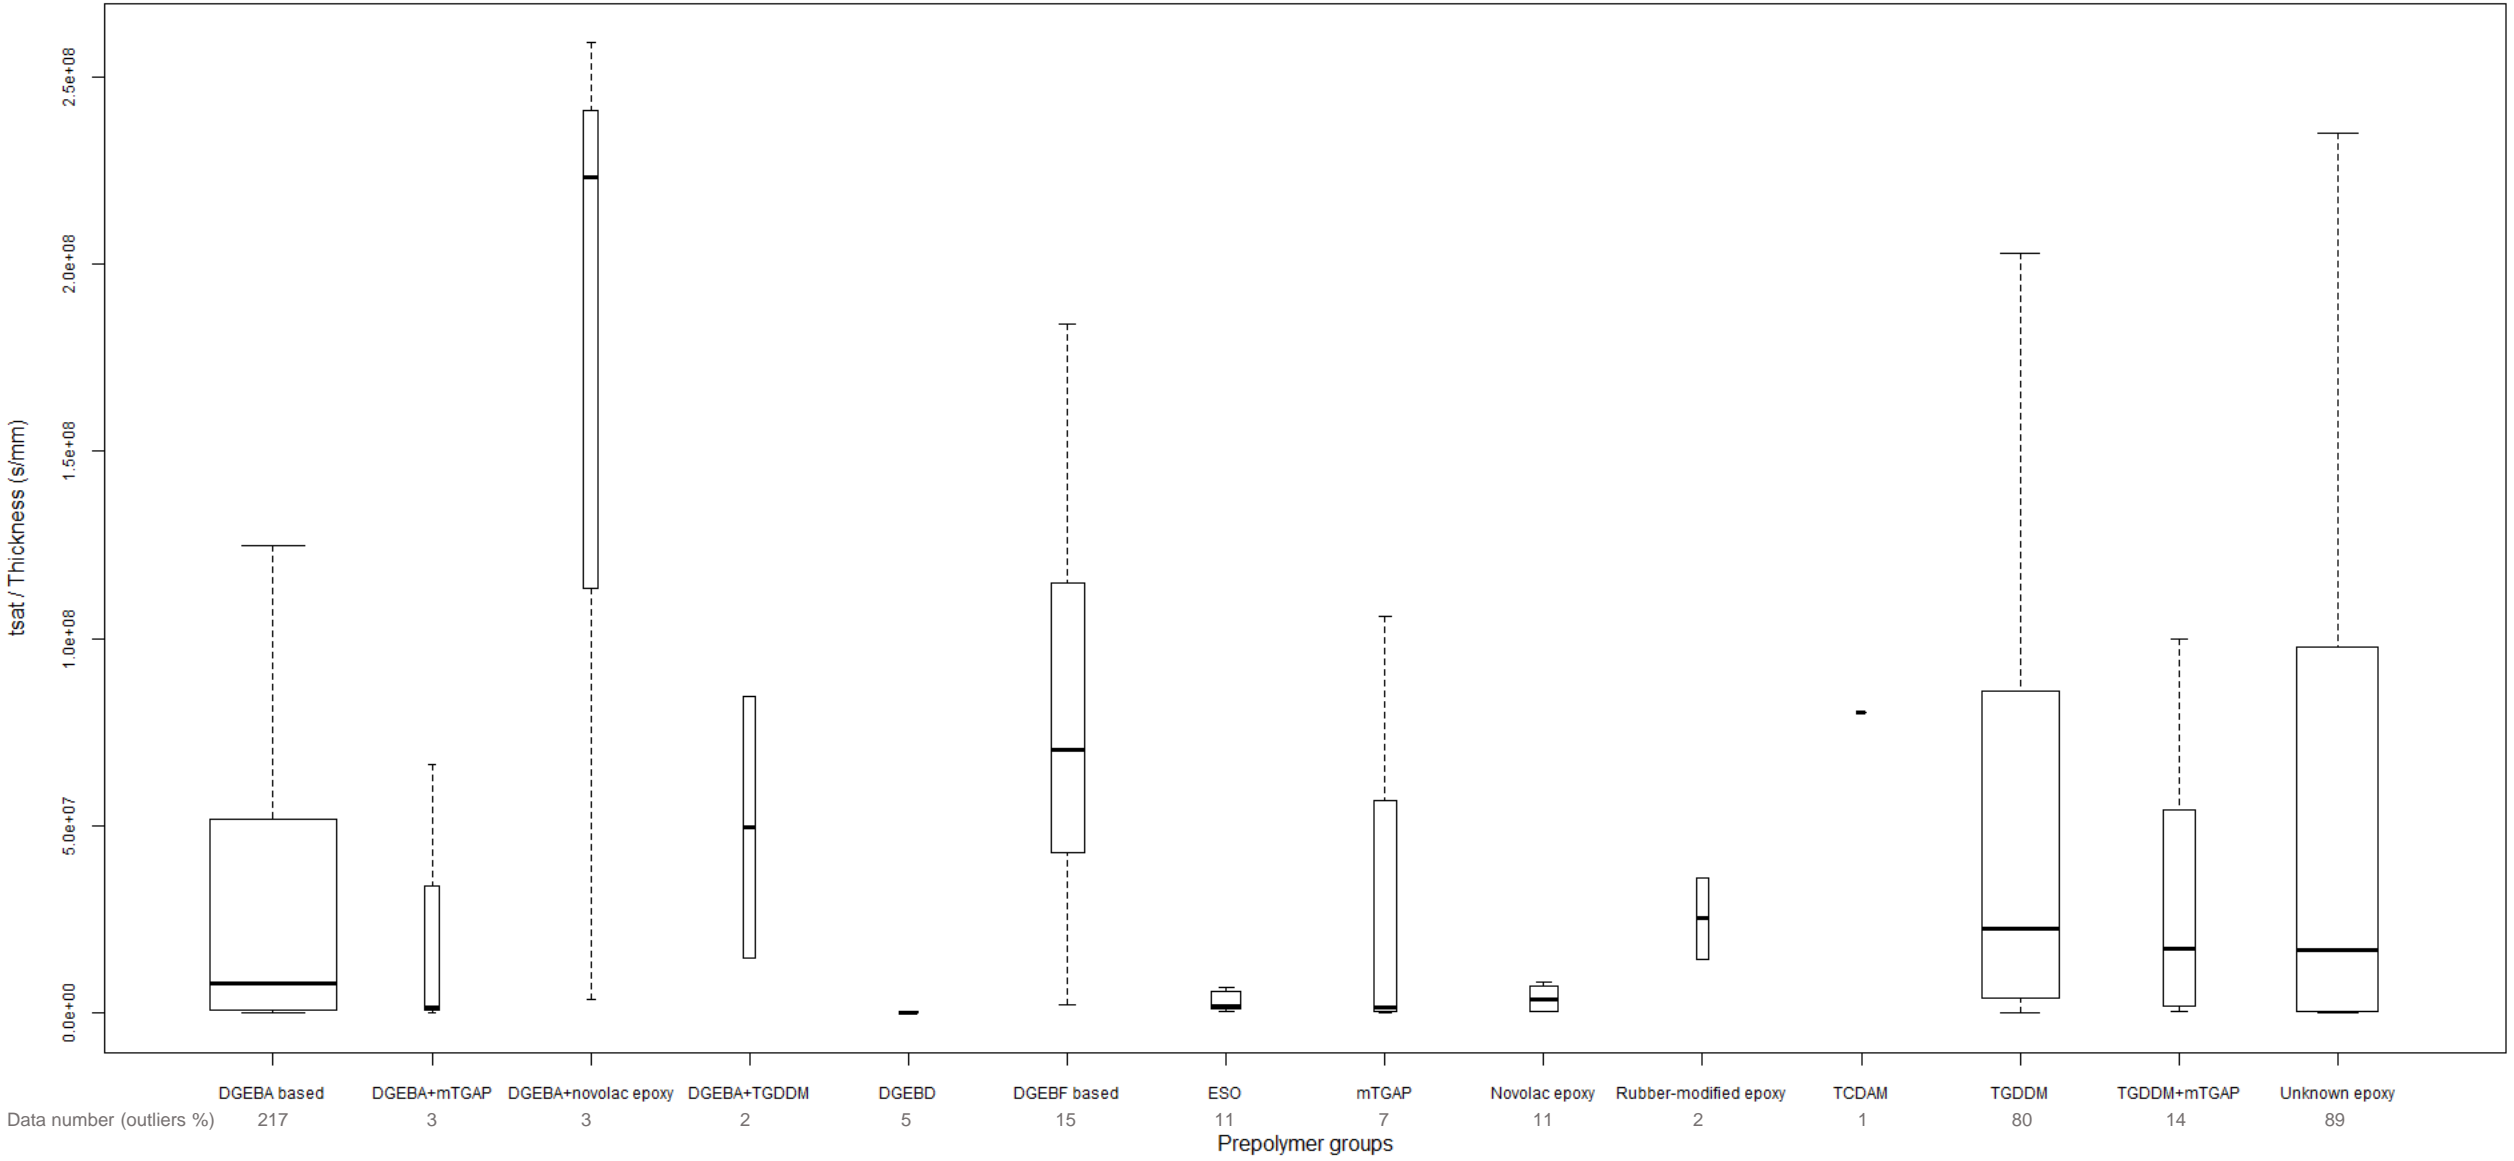

**Figure S5.** Boxplots of  $M_{sat}$  as a function of epoxy prepolymer type.

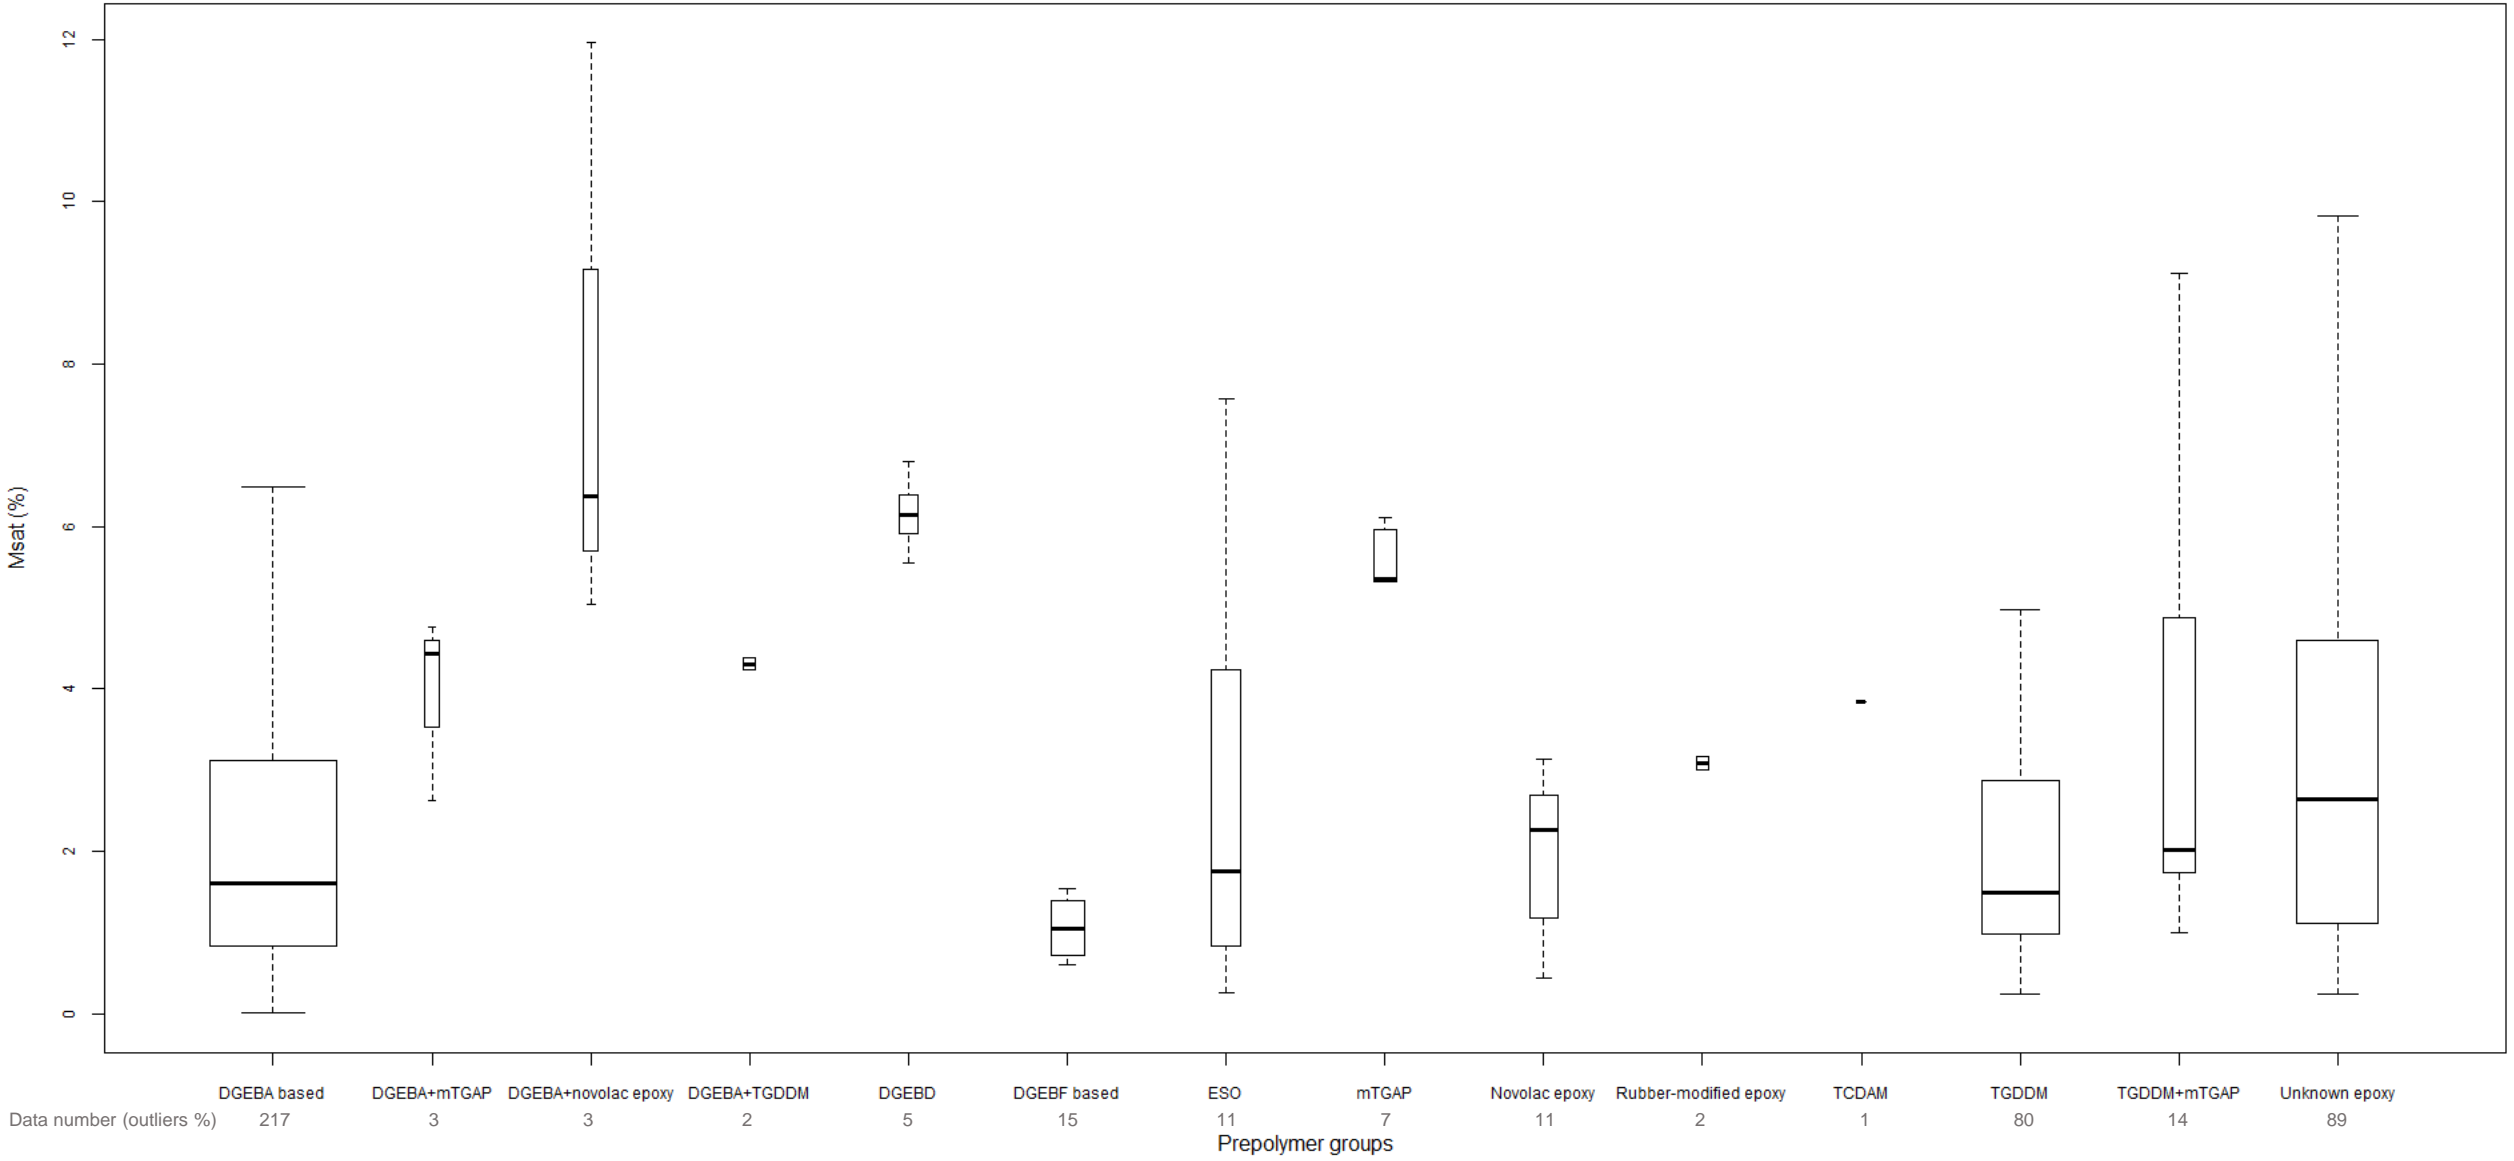

**Figure S6.** Boxplots of  $D$  as a function of hardener type.

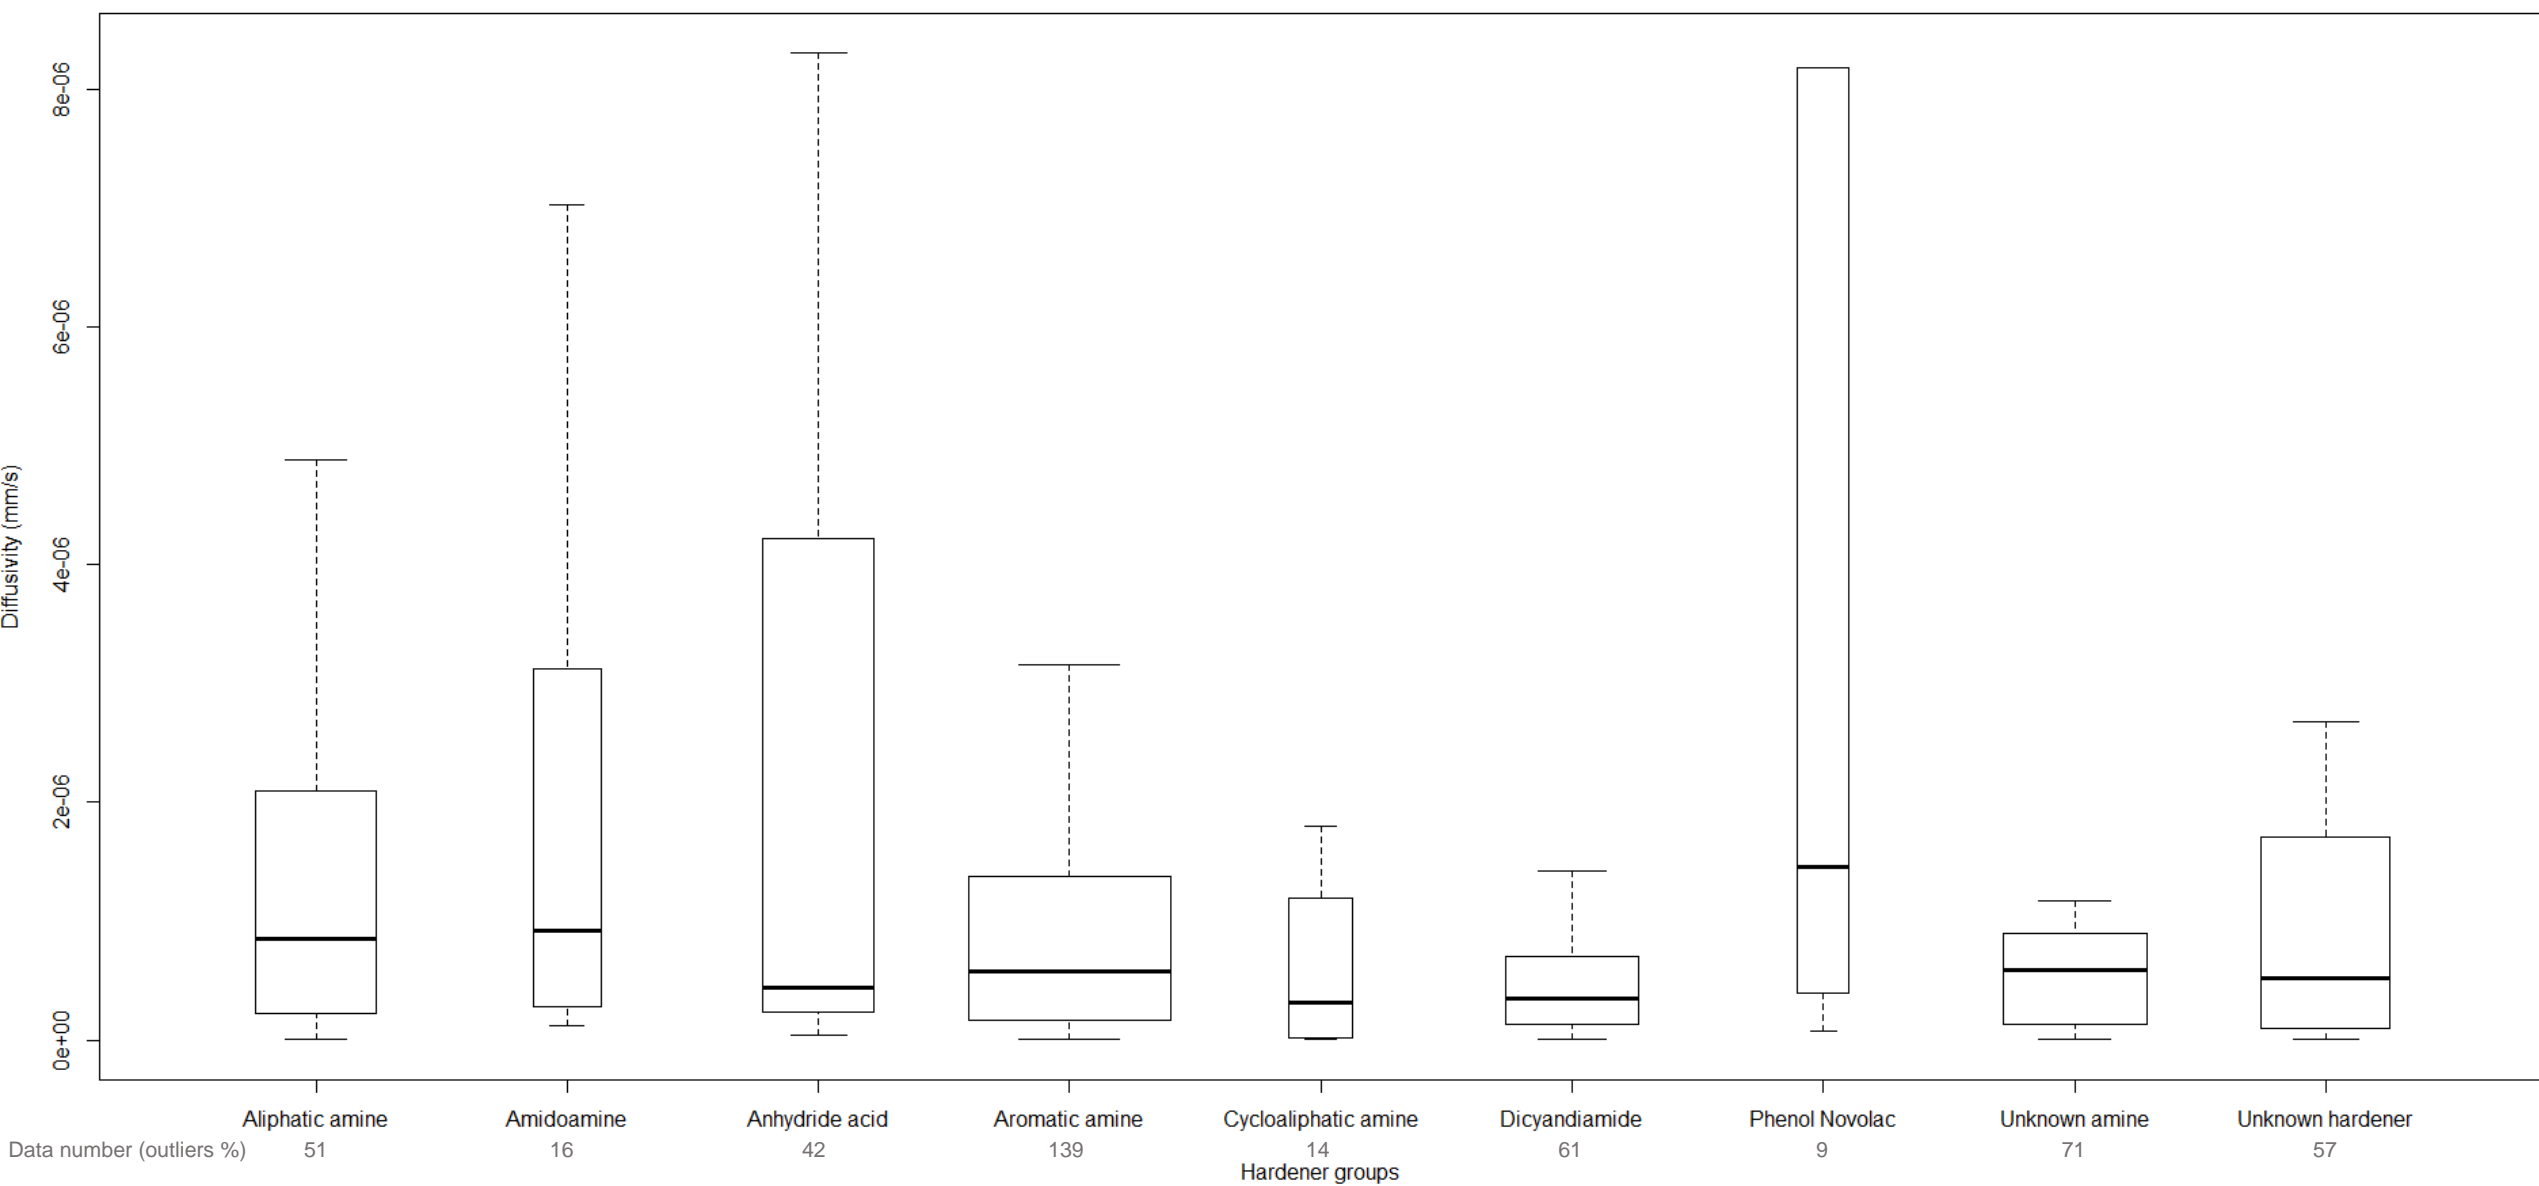

**Figure S7.** Boxplots of  $t_{sat}/h$  as a function of hardener type.

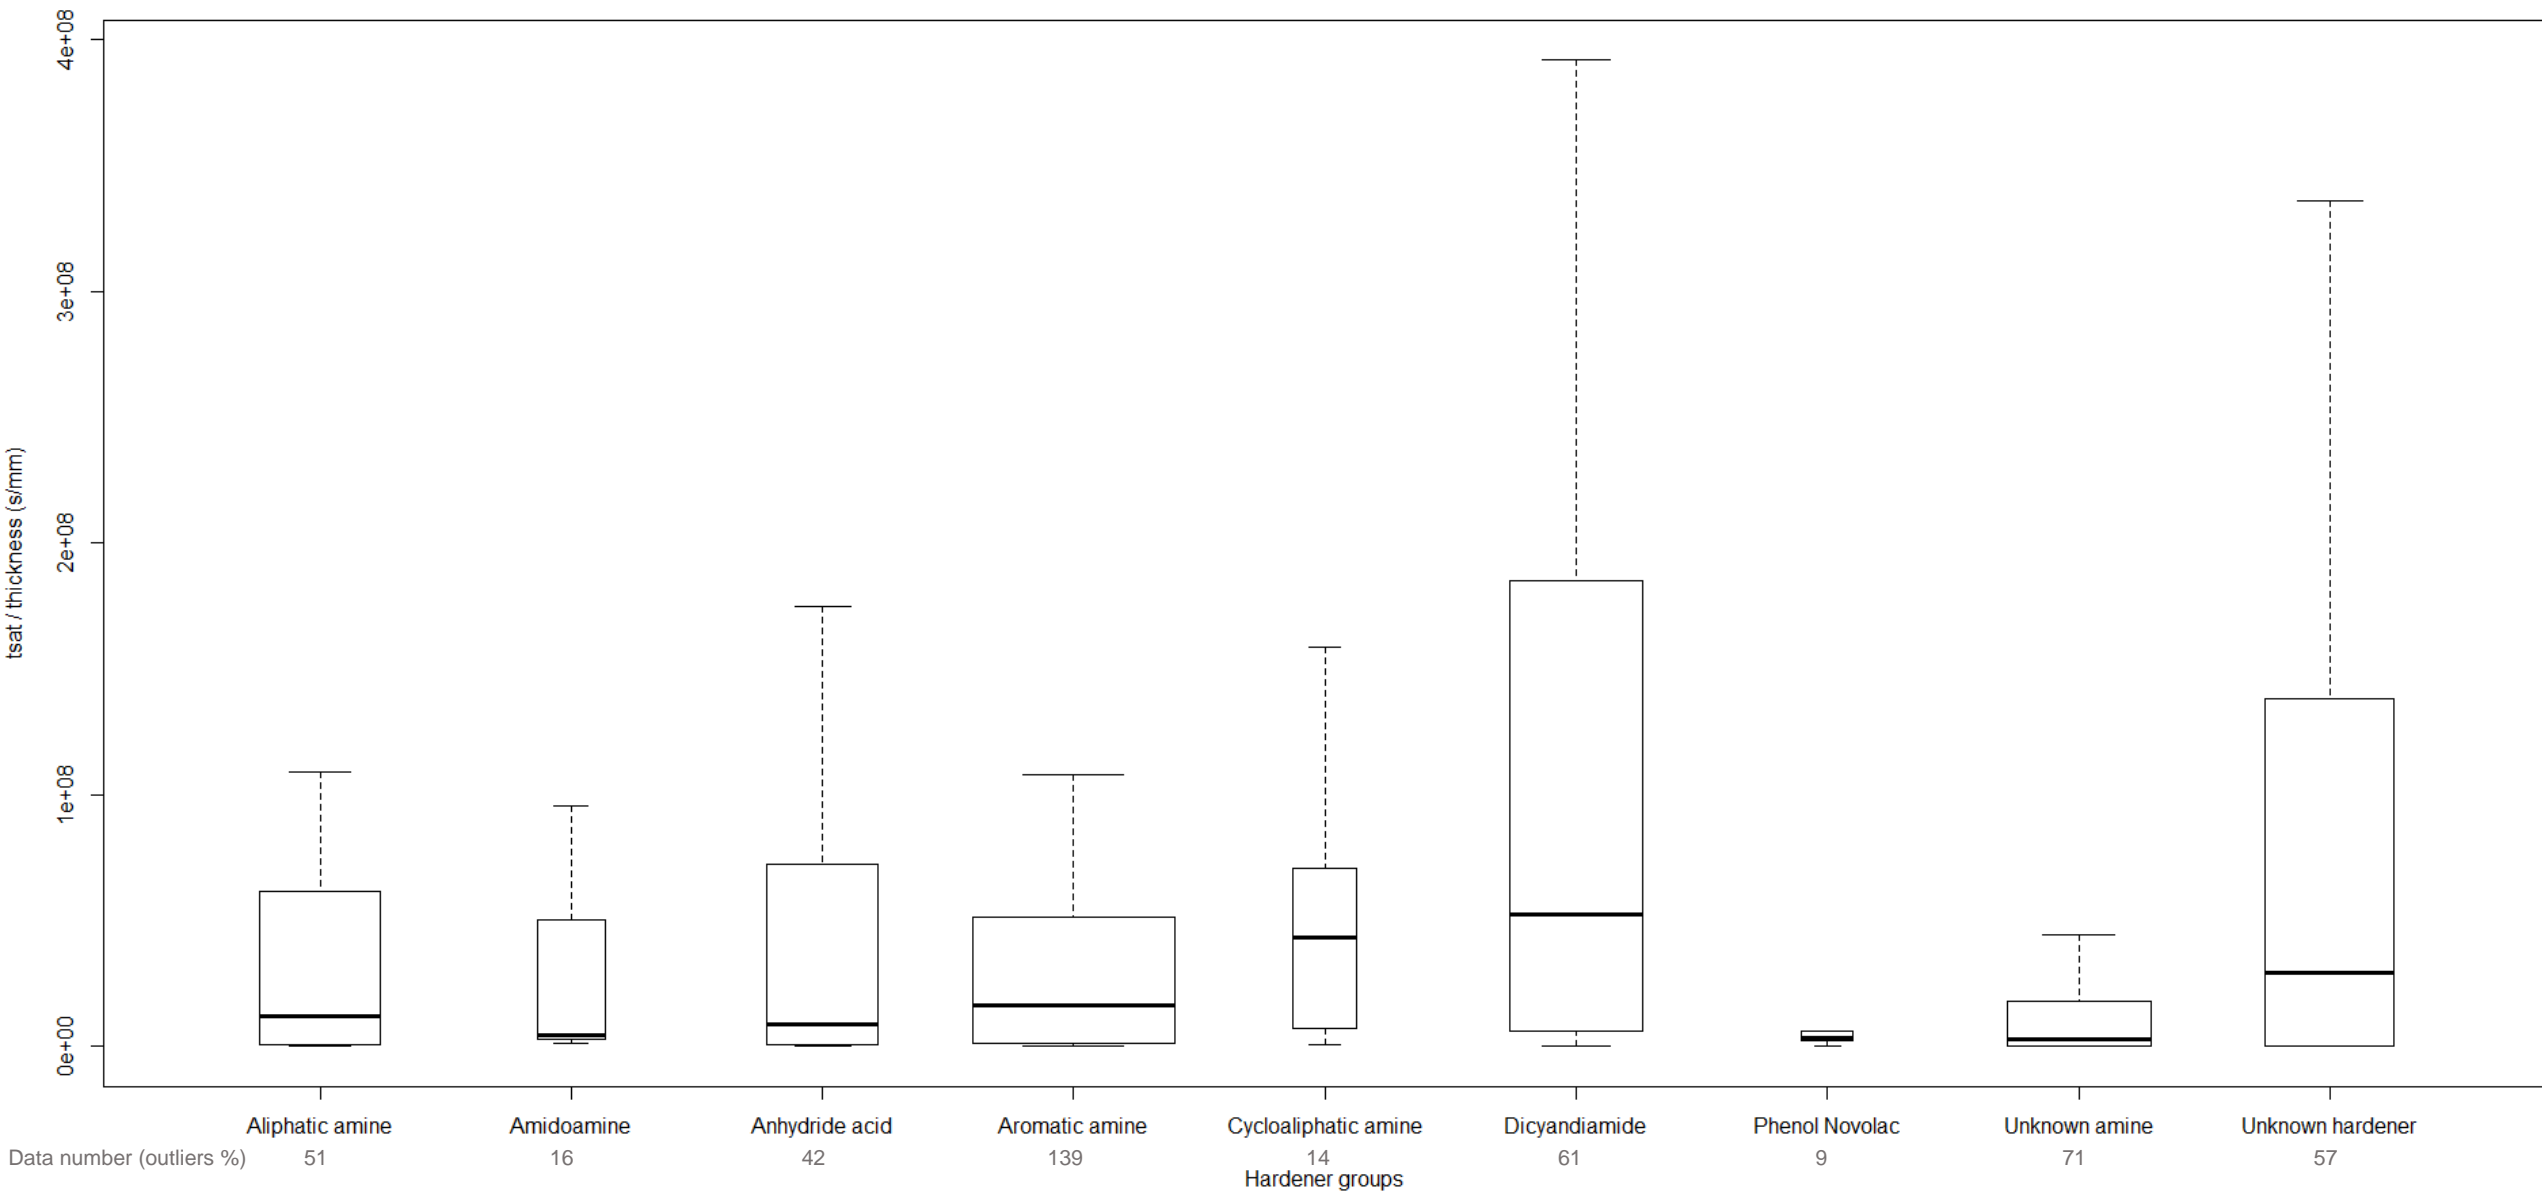



**Figure S8.** Boxplots of  $M_{sat}$  as a function of hardener type.

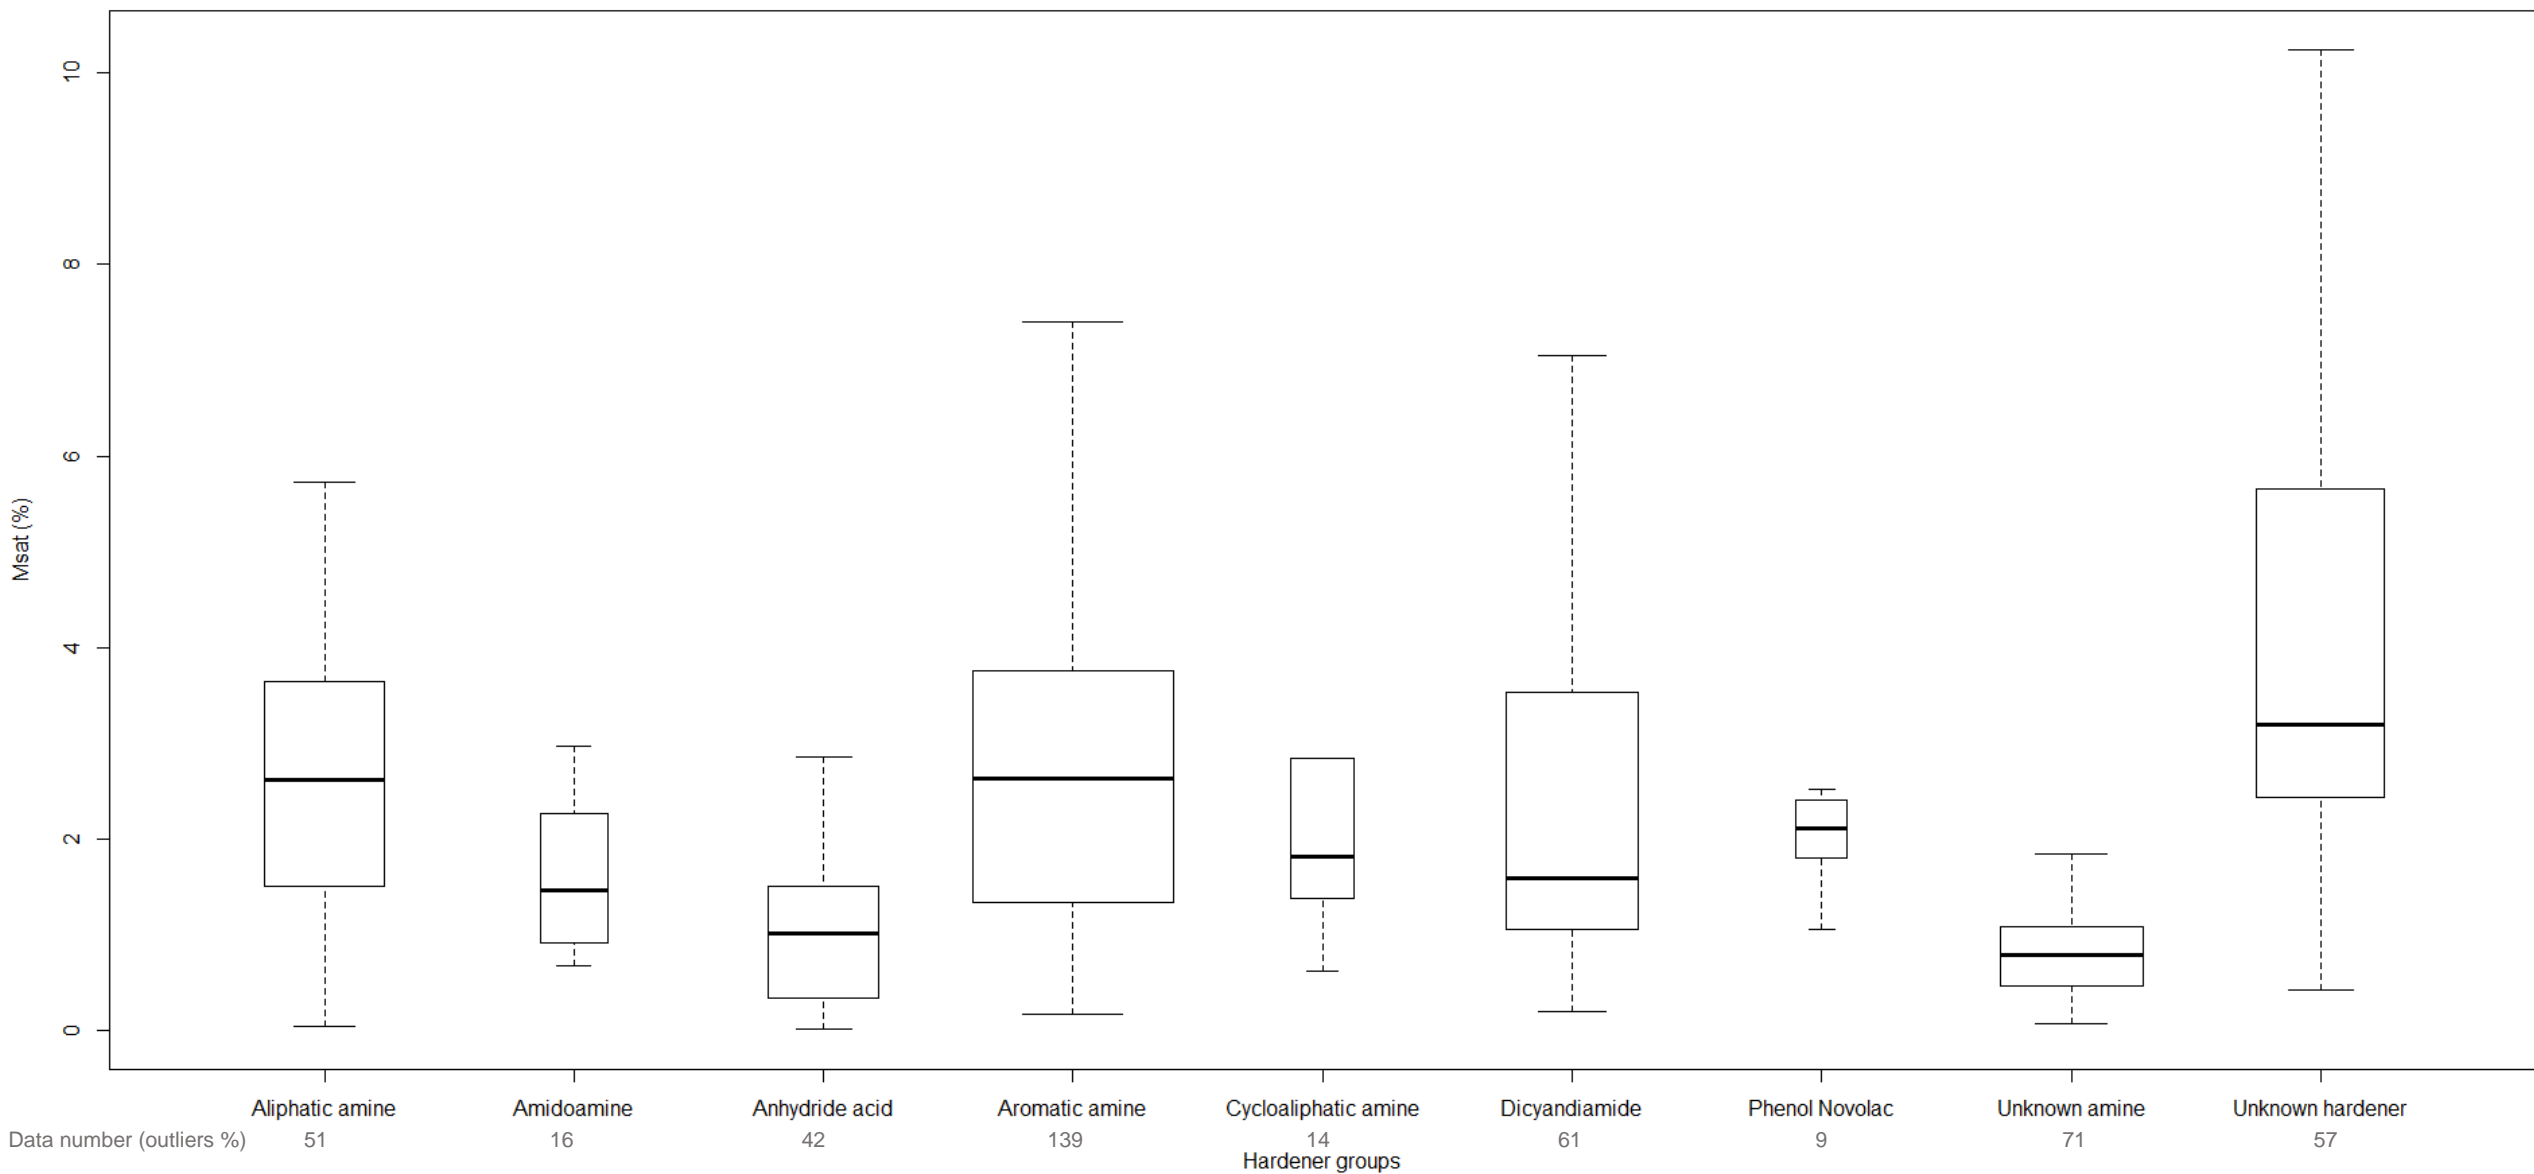

**Figure S9.** Boxplots of  $D$  as a function of reinforcement type.

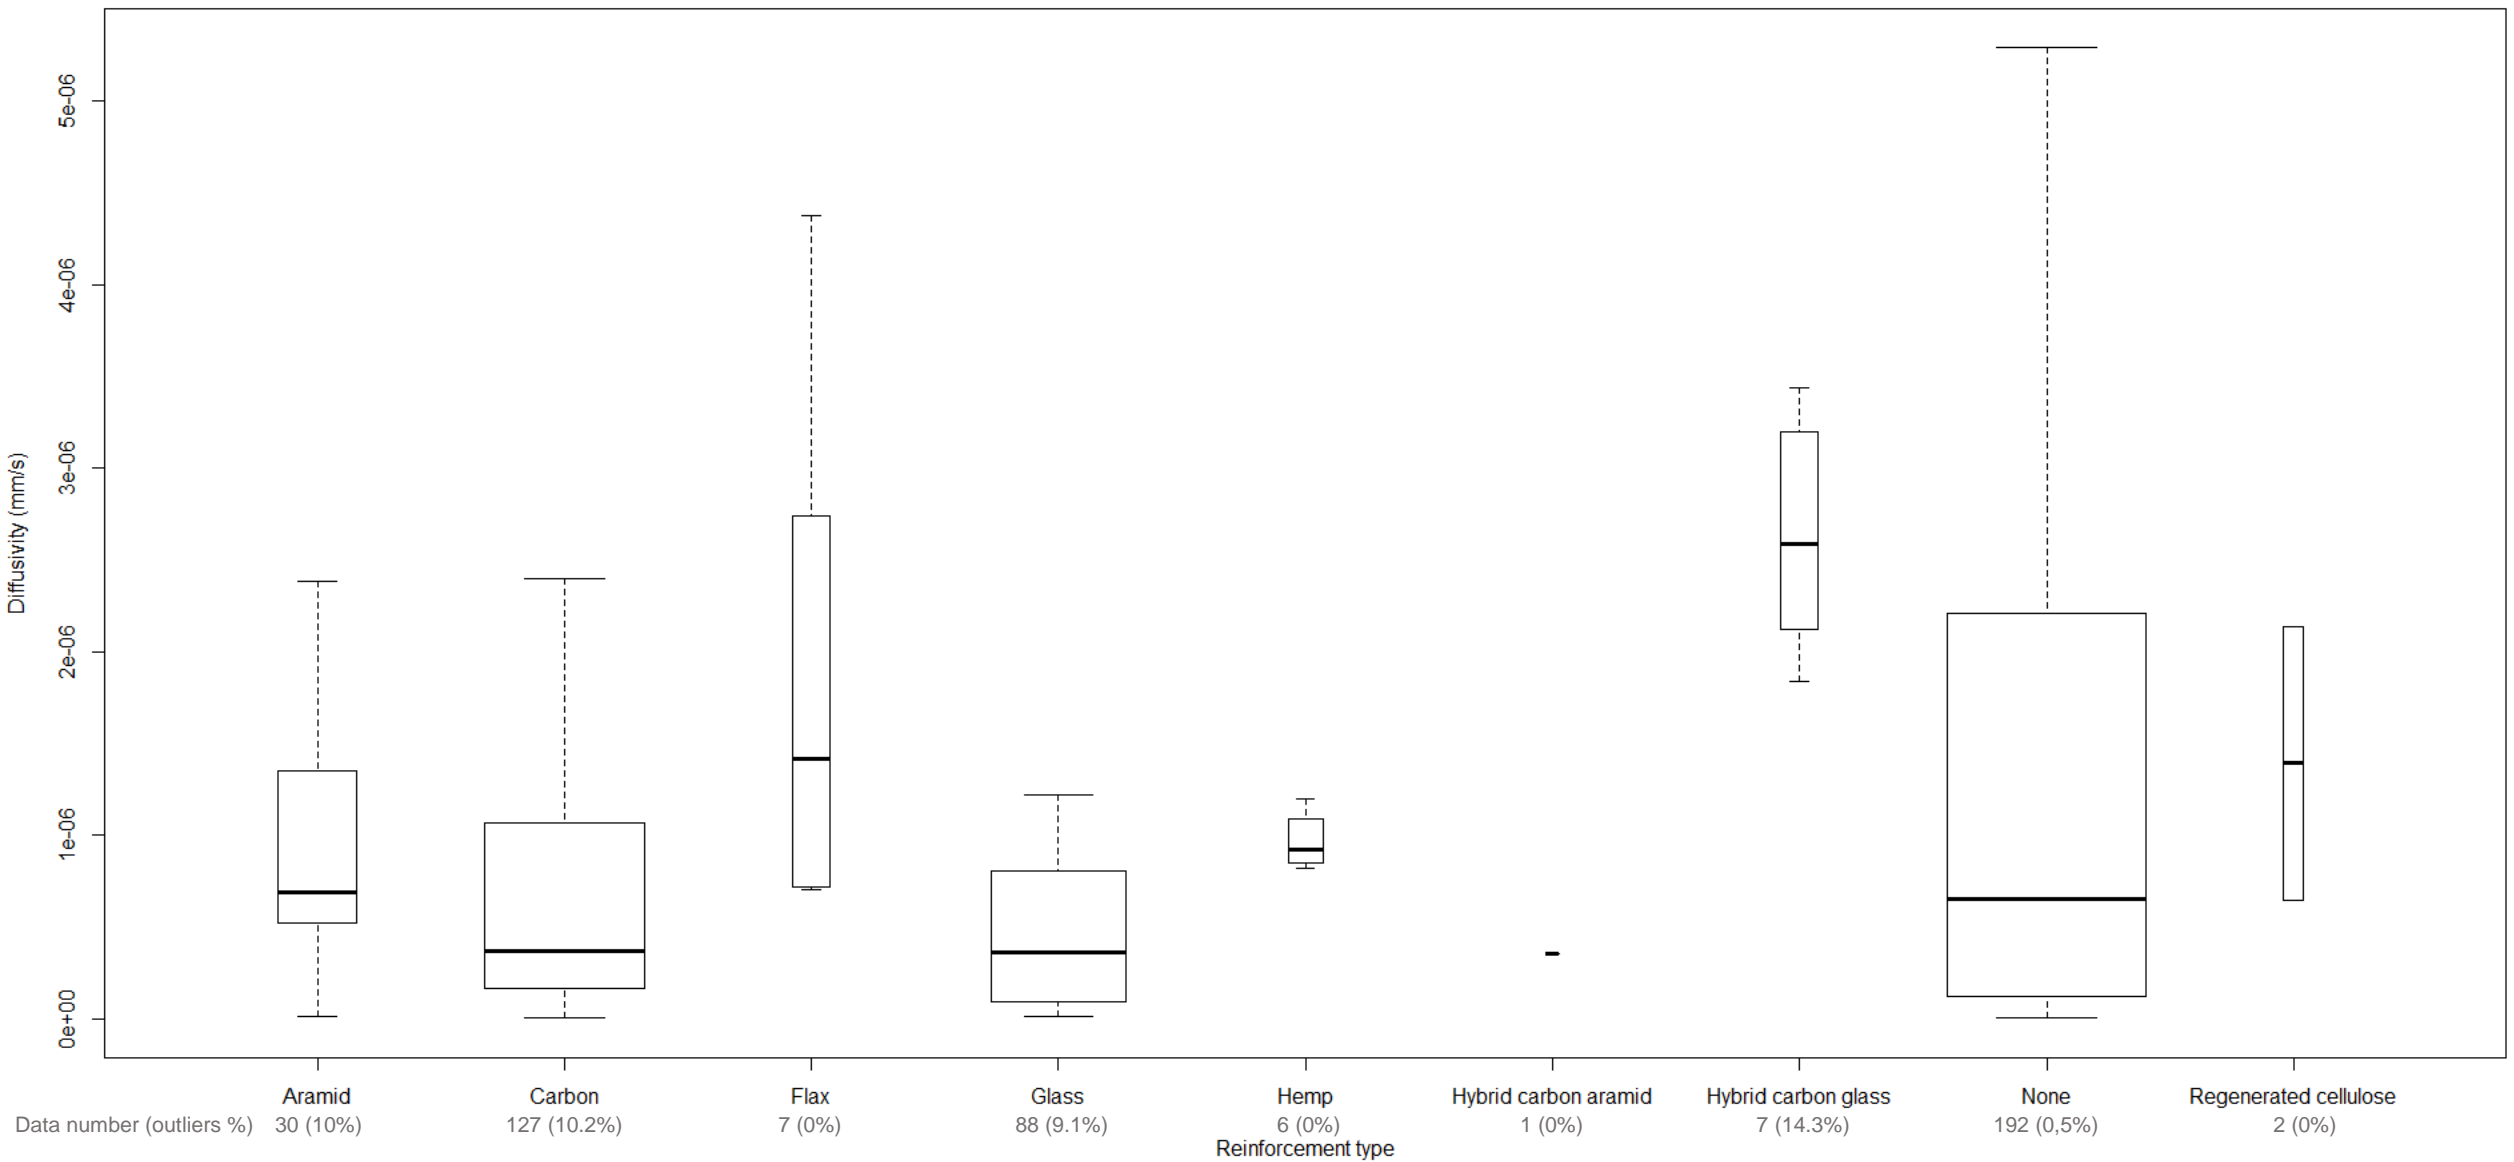

**Figure S10.** Boxplots of  $M_{sat}$  as a function of reinforcement type.

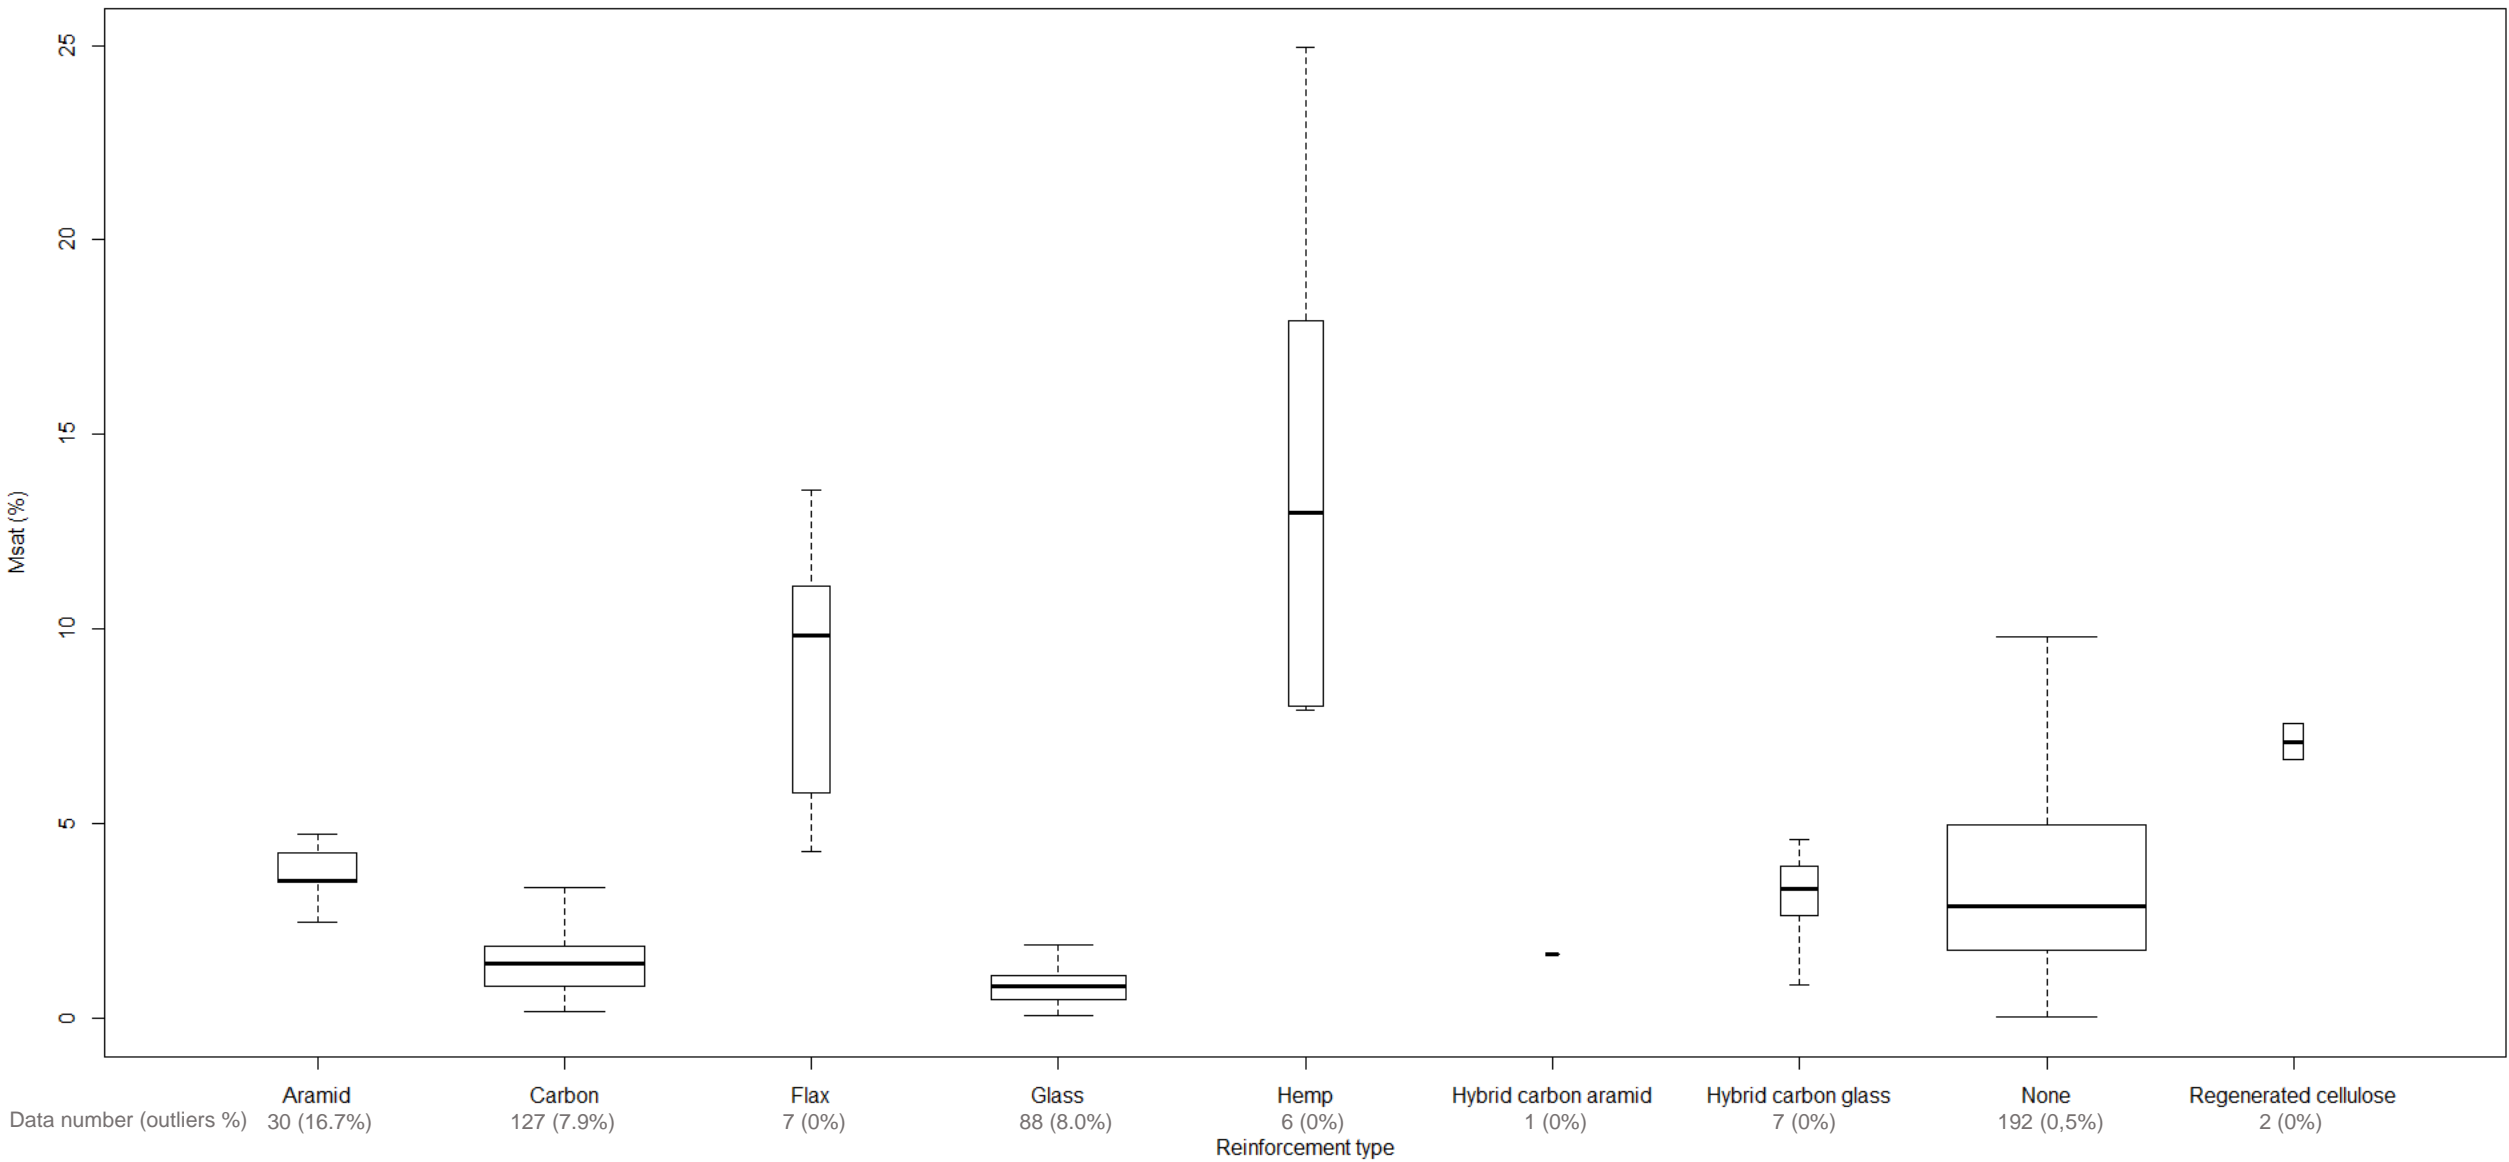

**Figure S11.** Boxplots of  $t_{sat}/h$  as a function of reinforcement type.

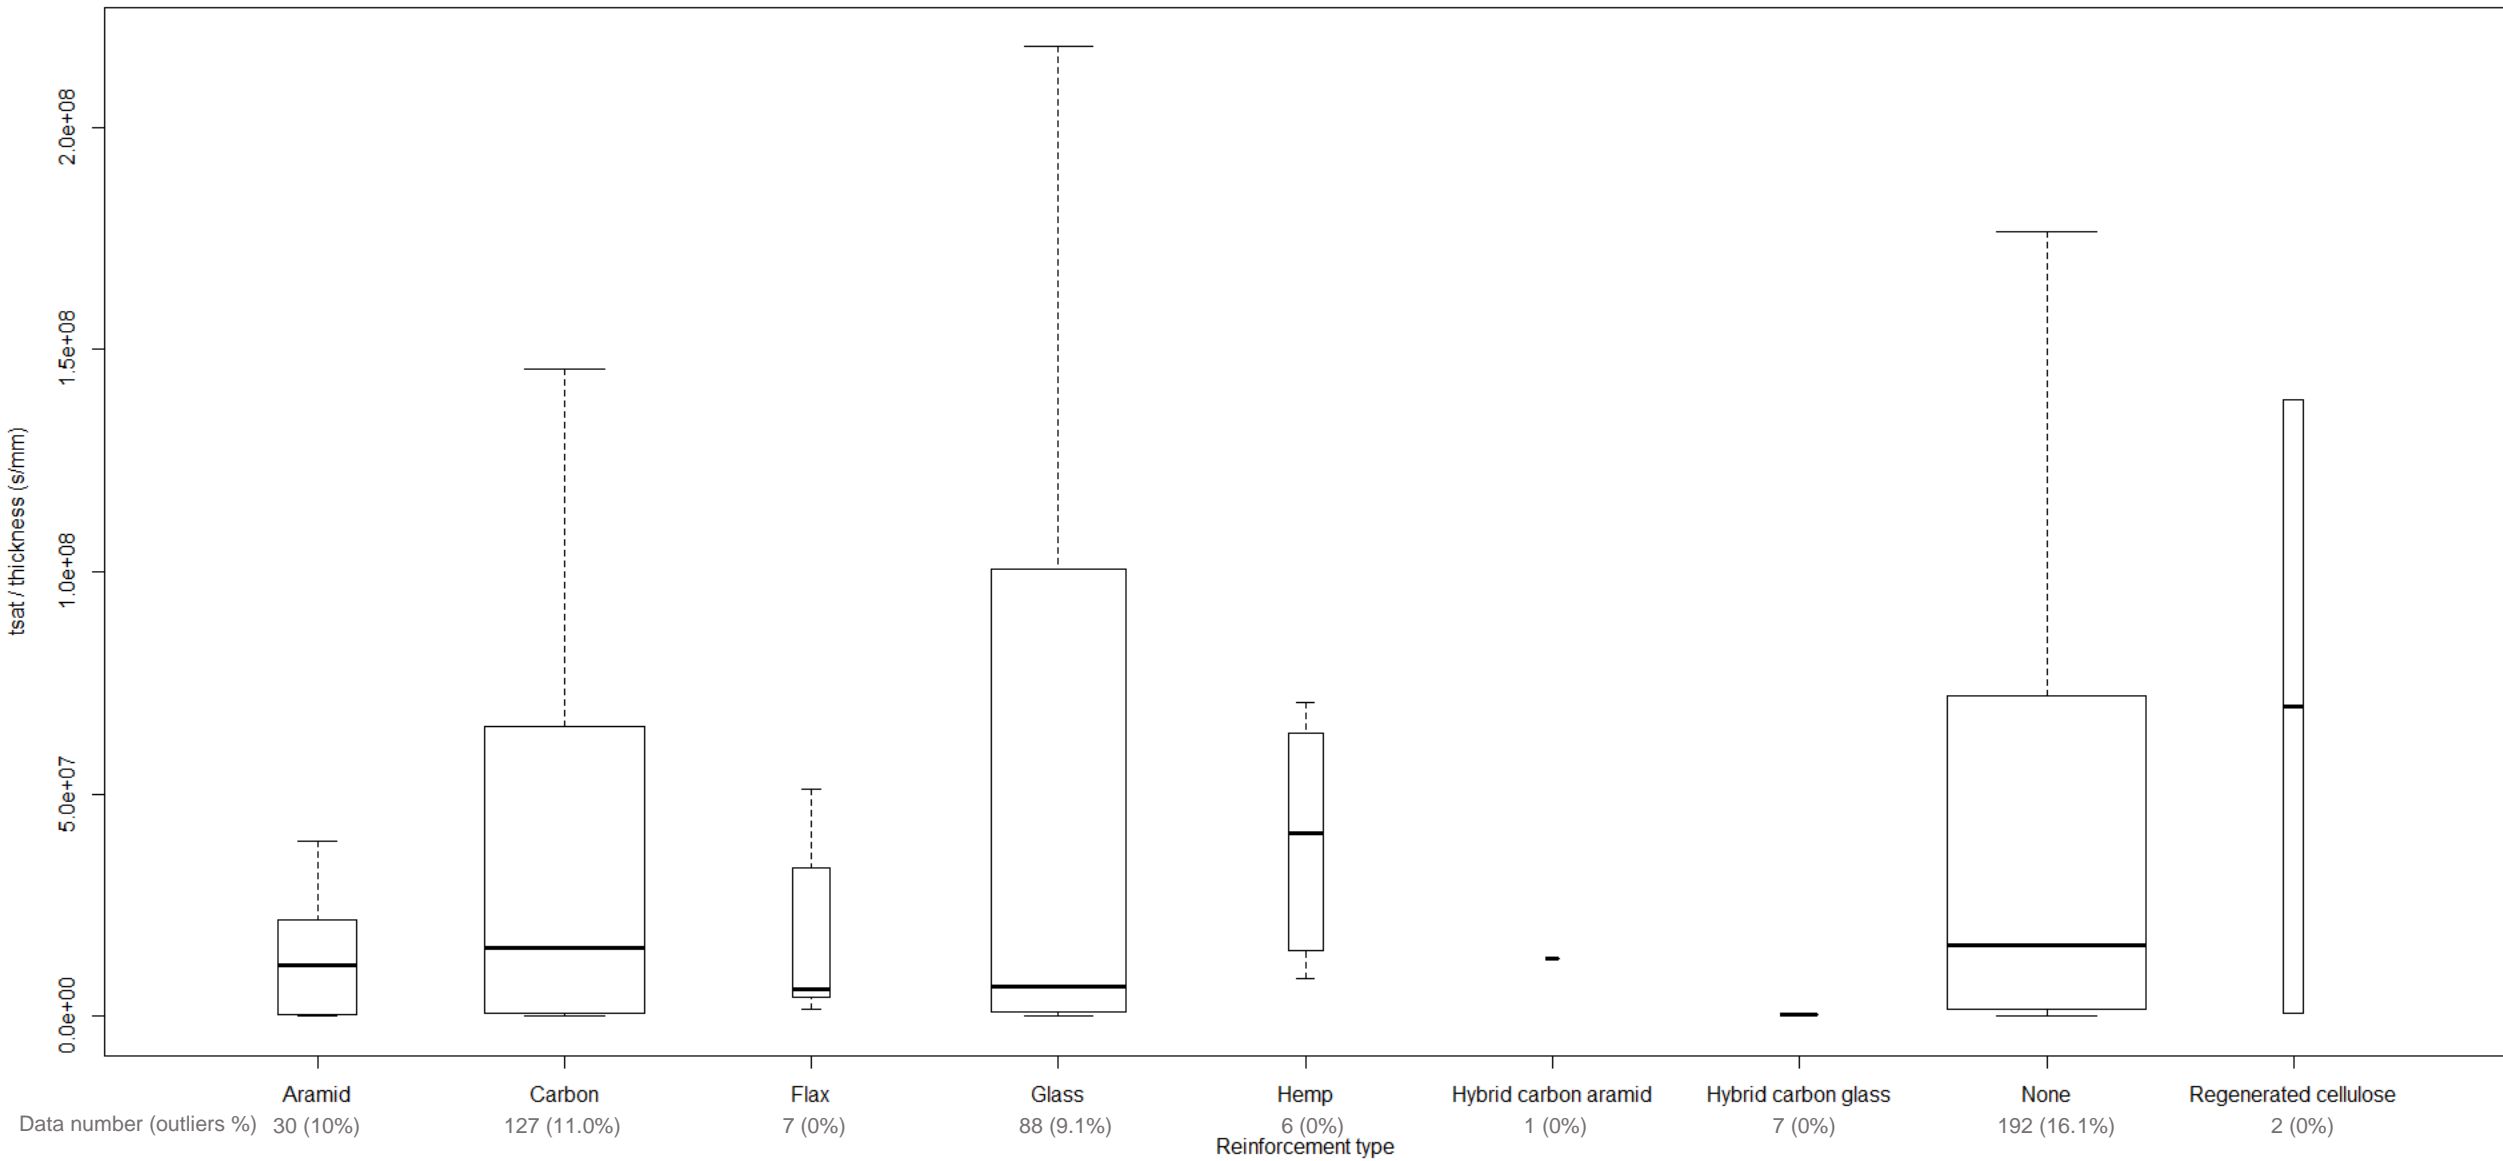

**Figure S12.** Boxplots of  $D$  as a function of fibre architecture.

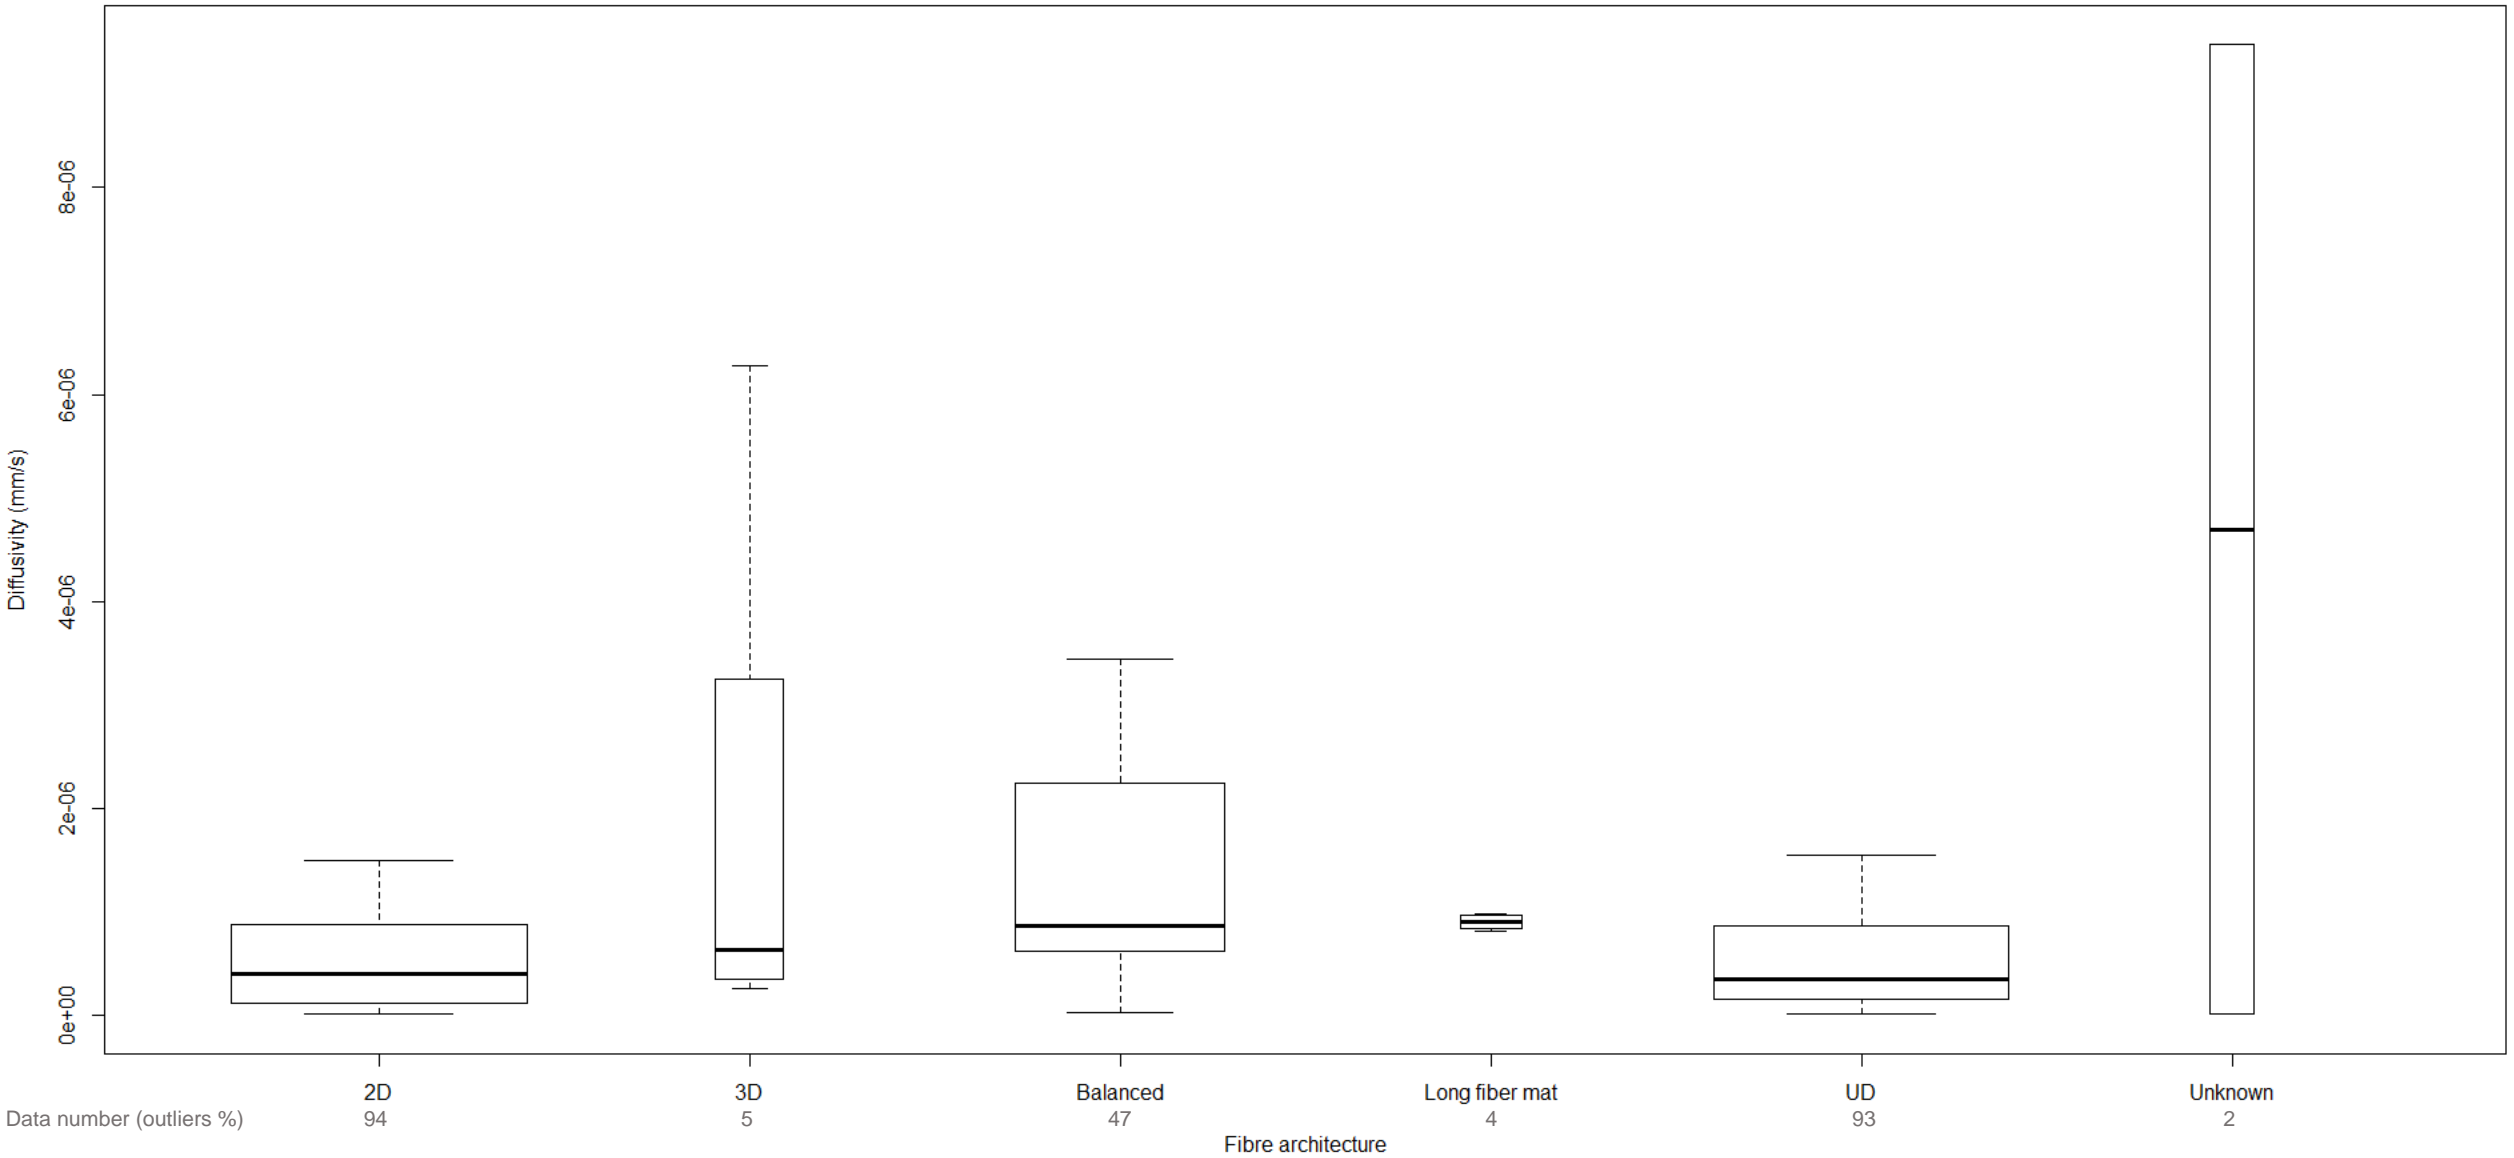

**Figure S13.** Boxplots of  $t_{sat}/h$  as a function of fibre architecture.

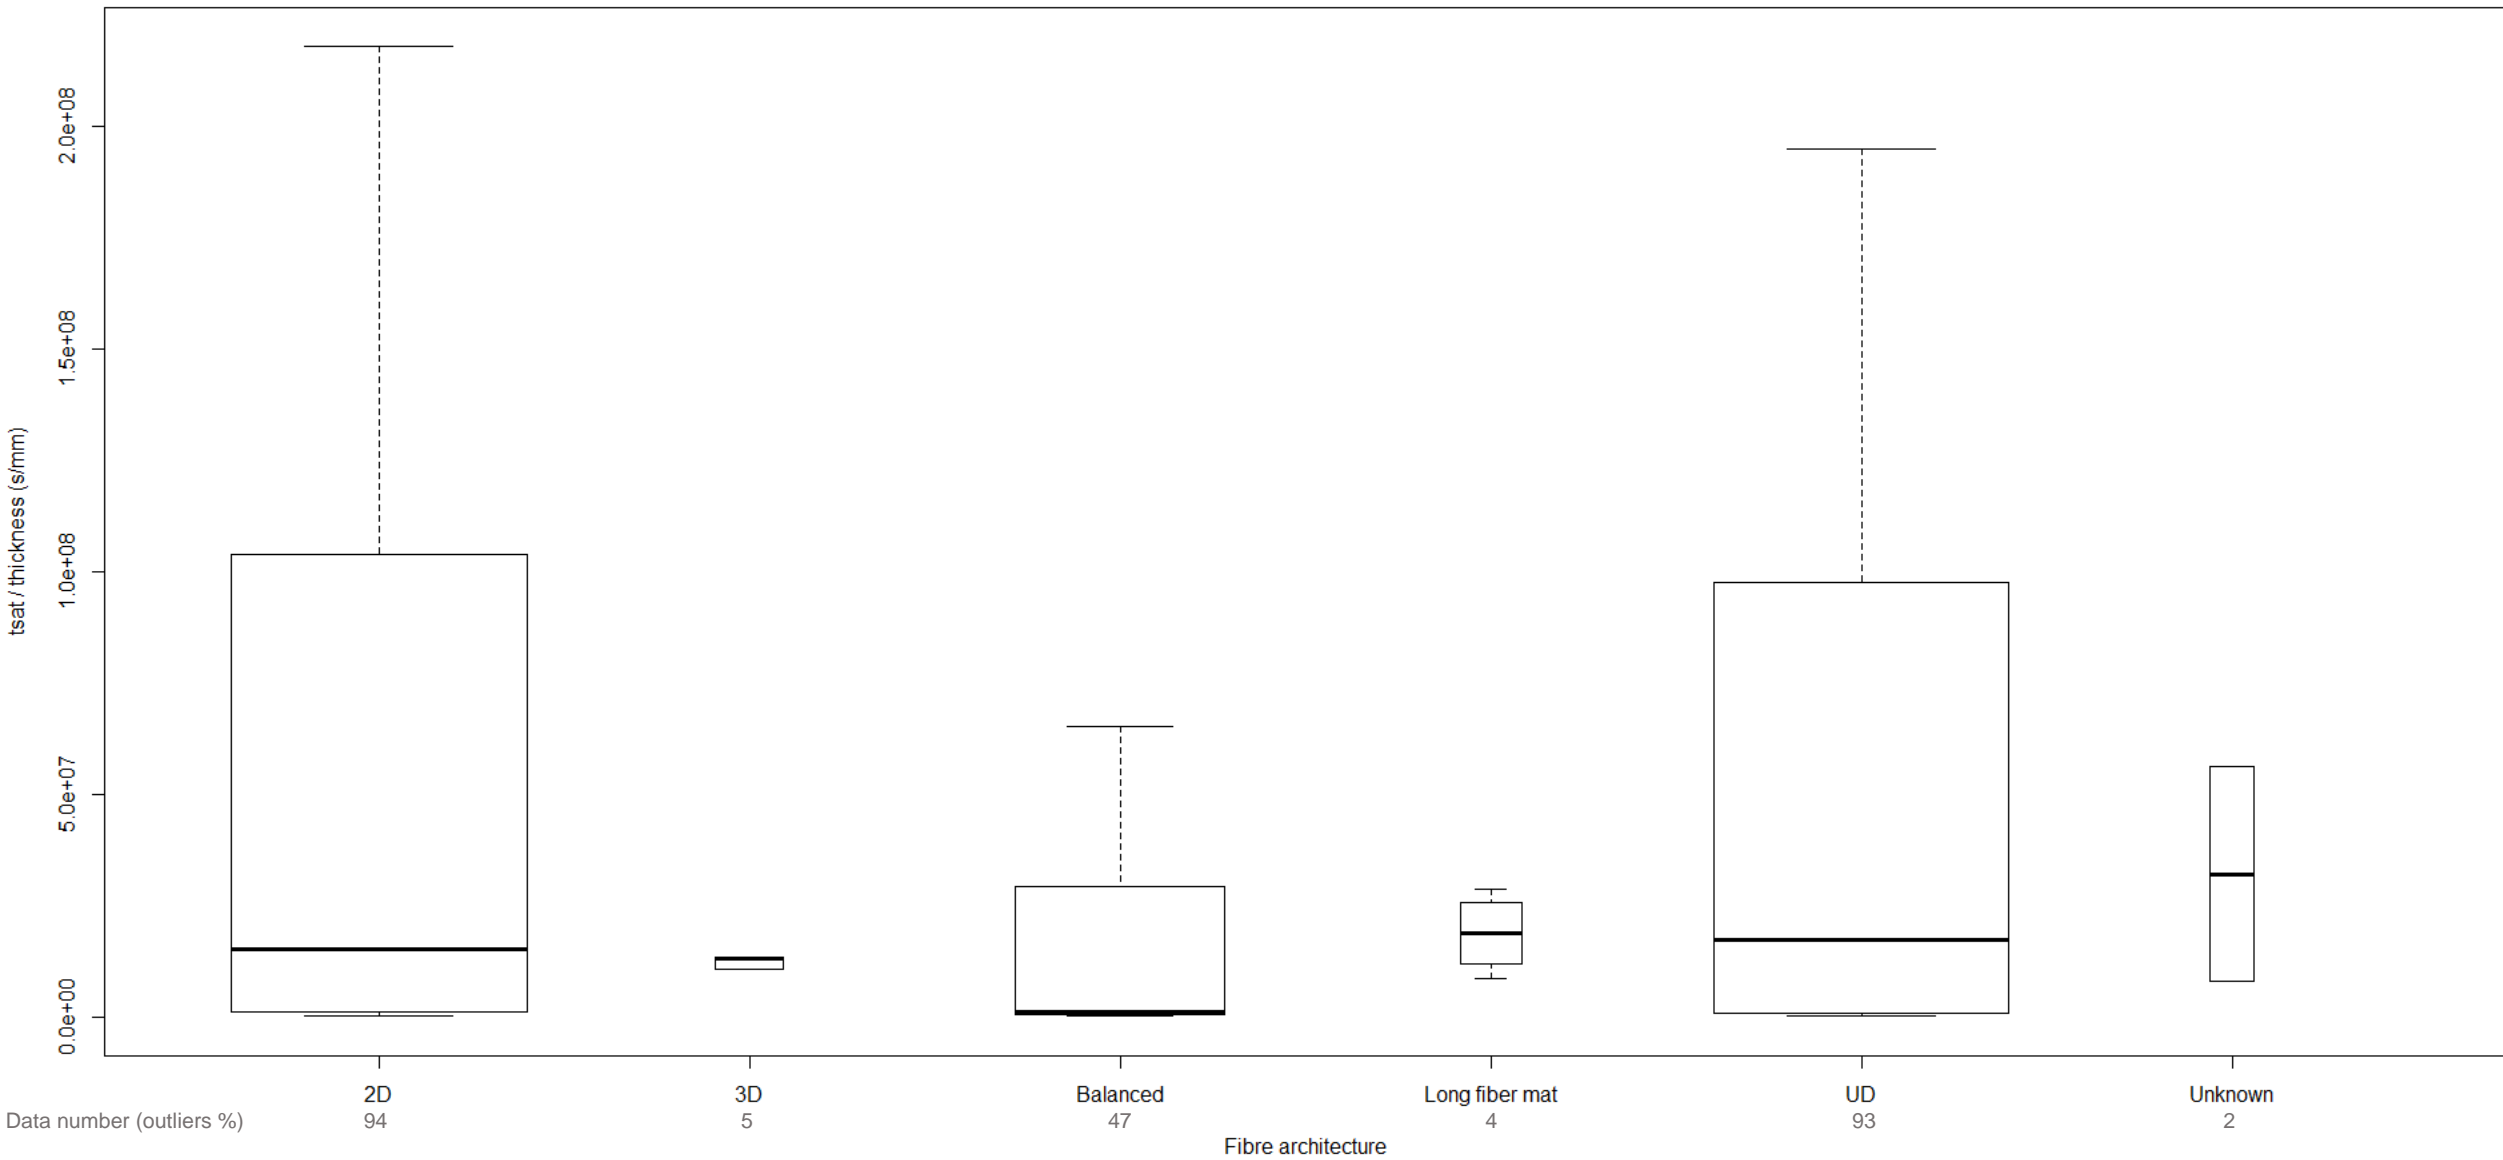

**Figure S14.** Boxplots of  $M_{sat}$  as a function of fibre architecture.

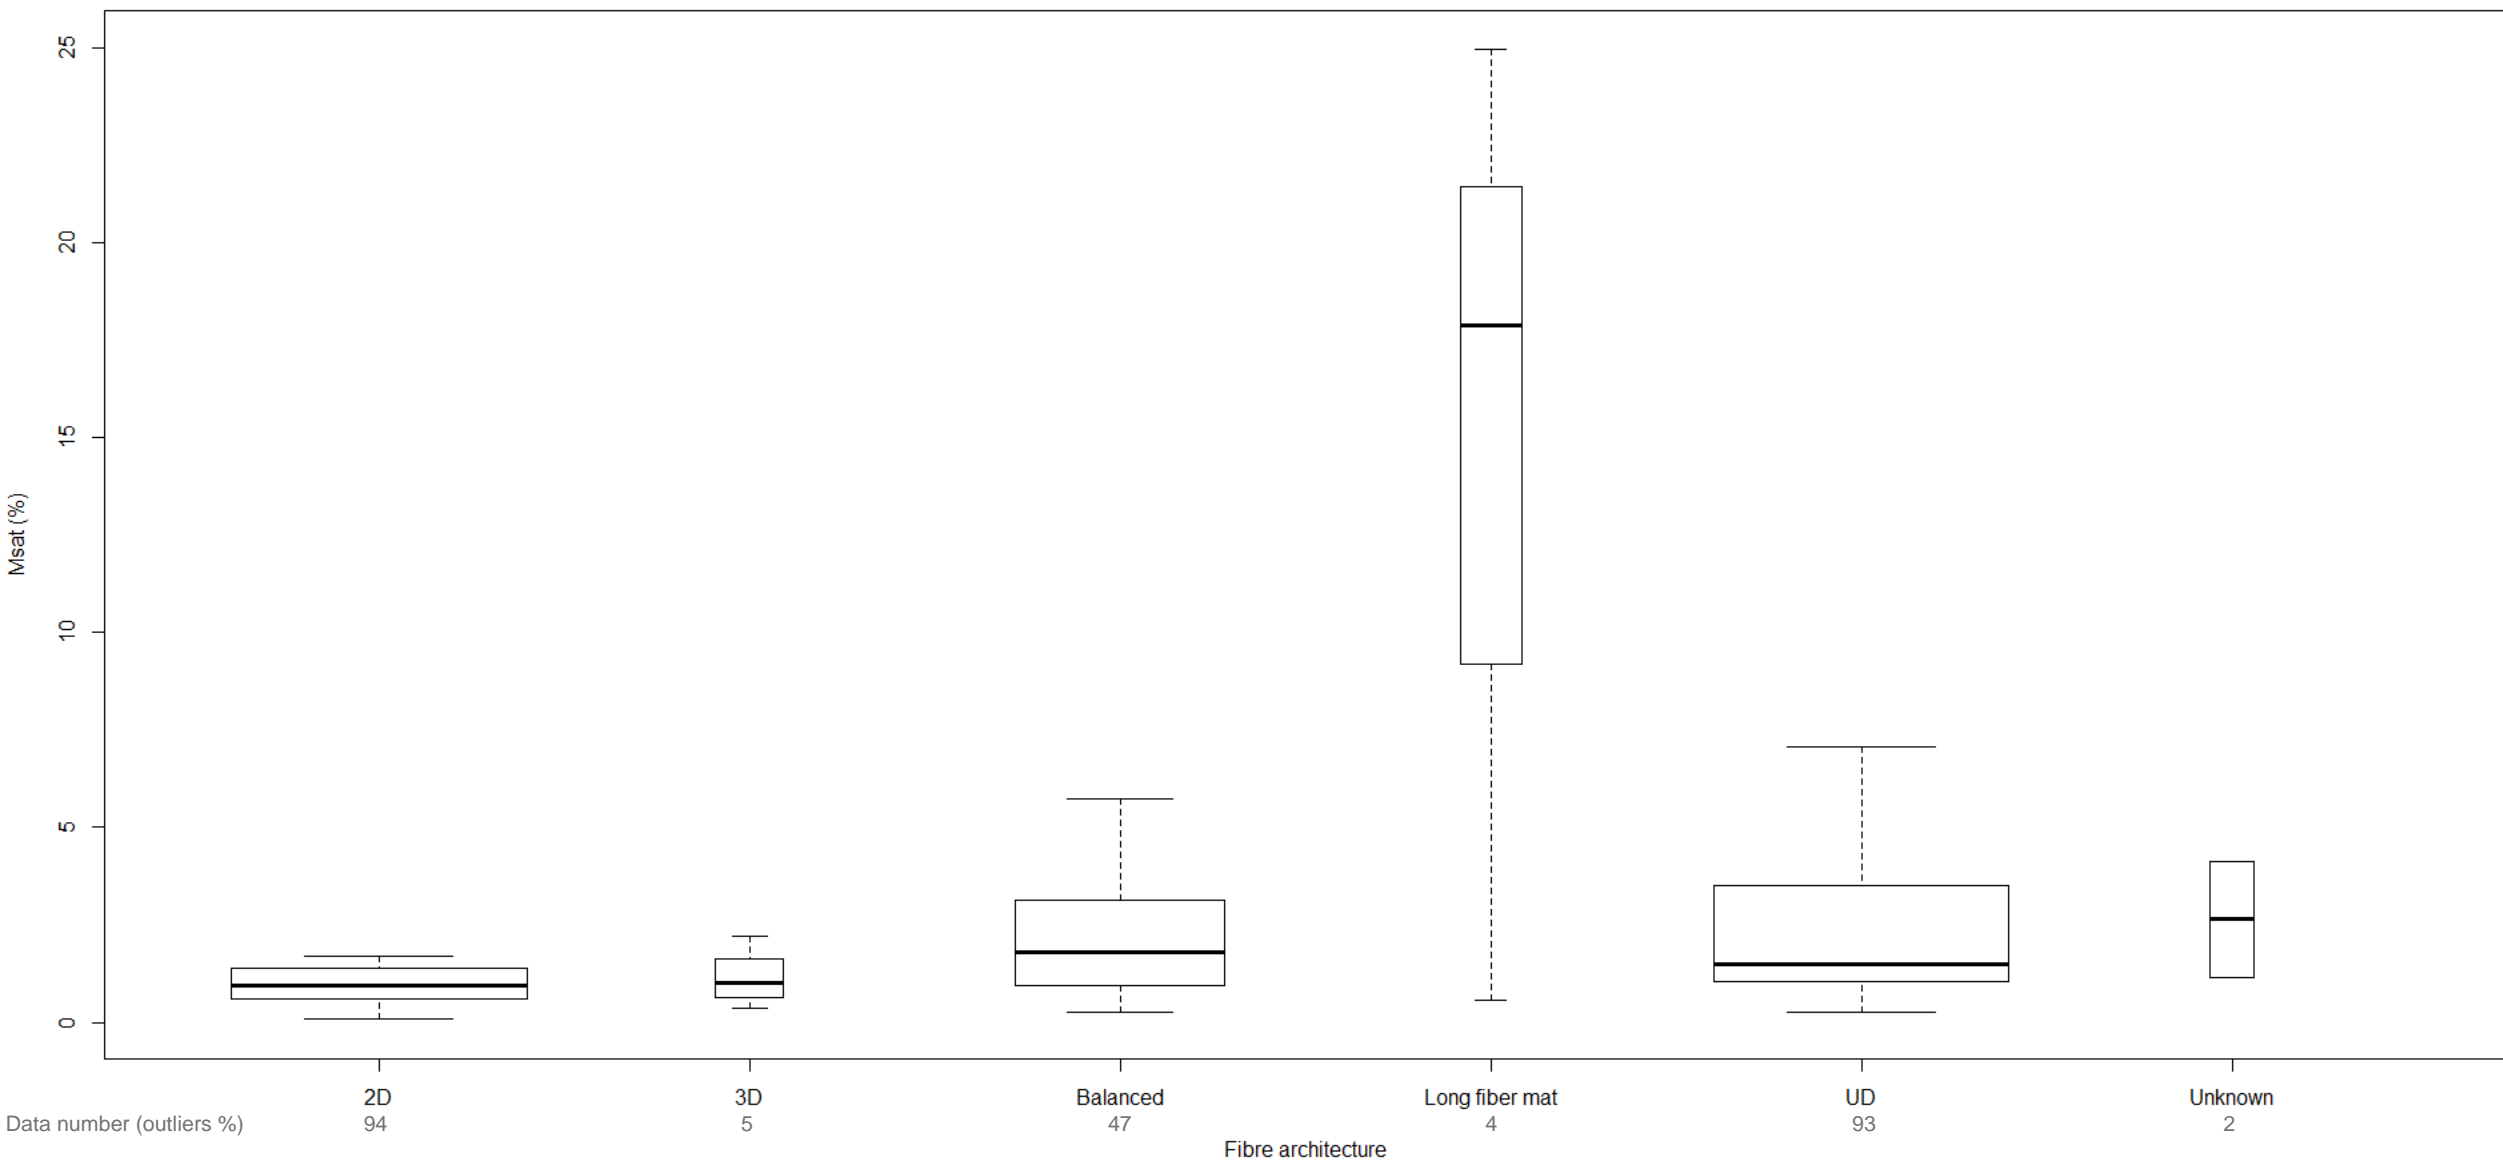

**Figure S15.** Boxplots of  $D$  as a function of process.

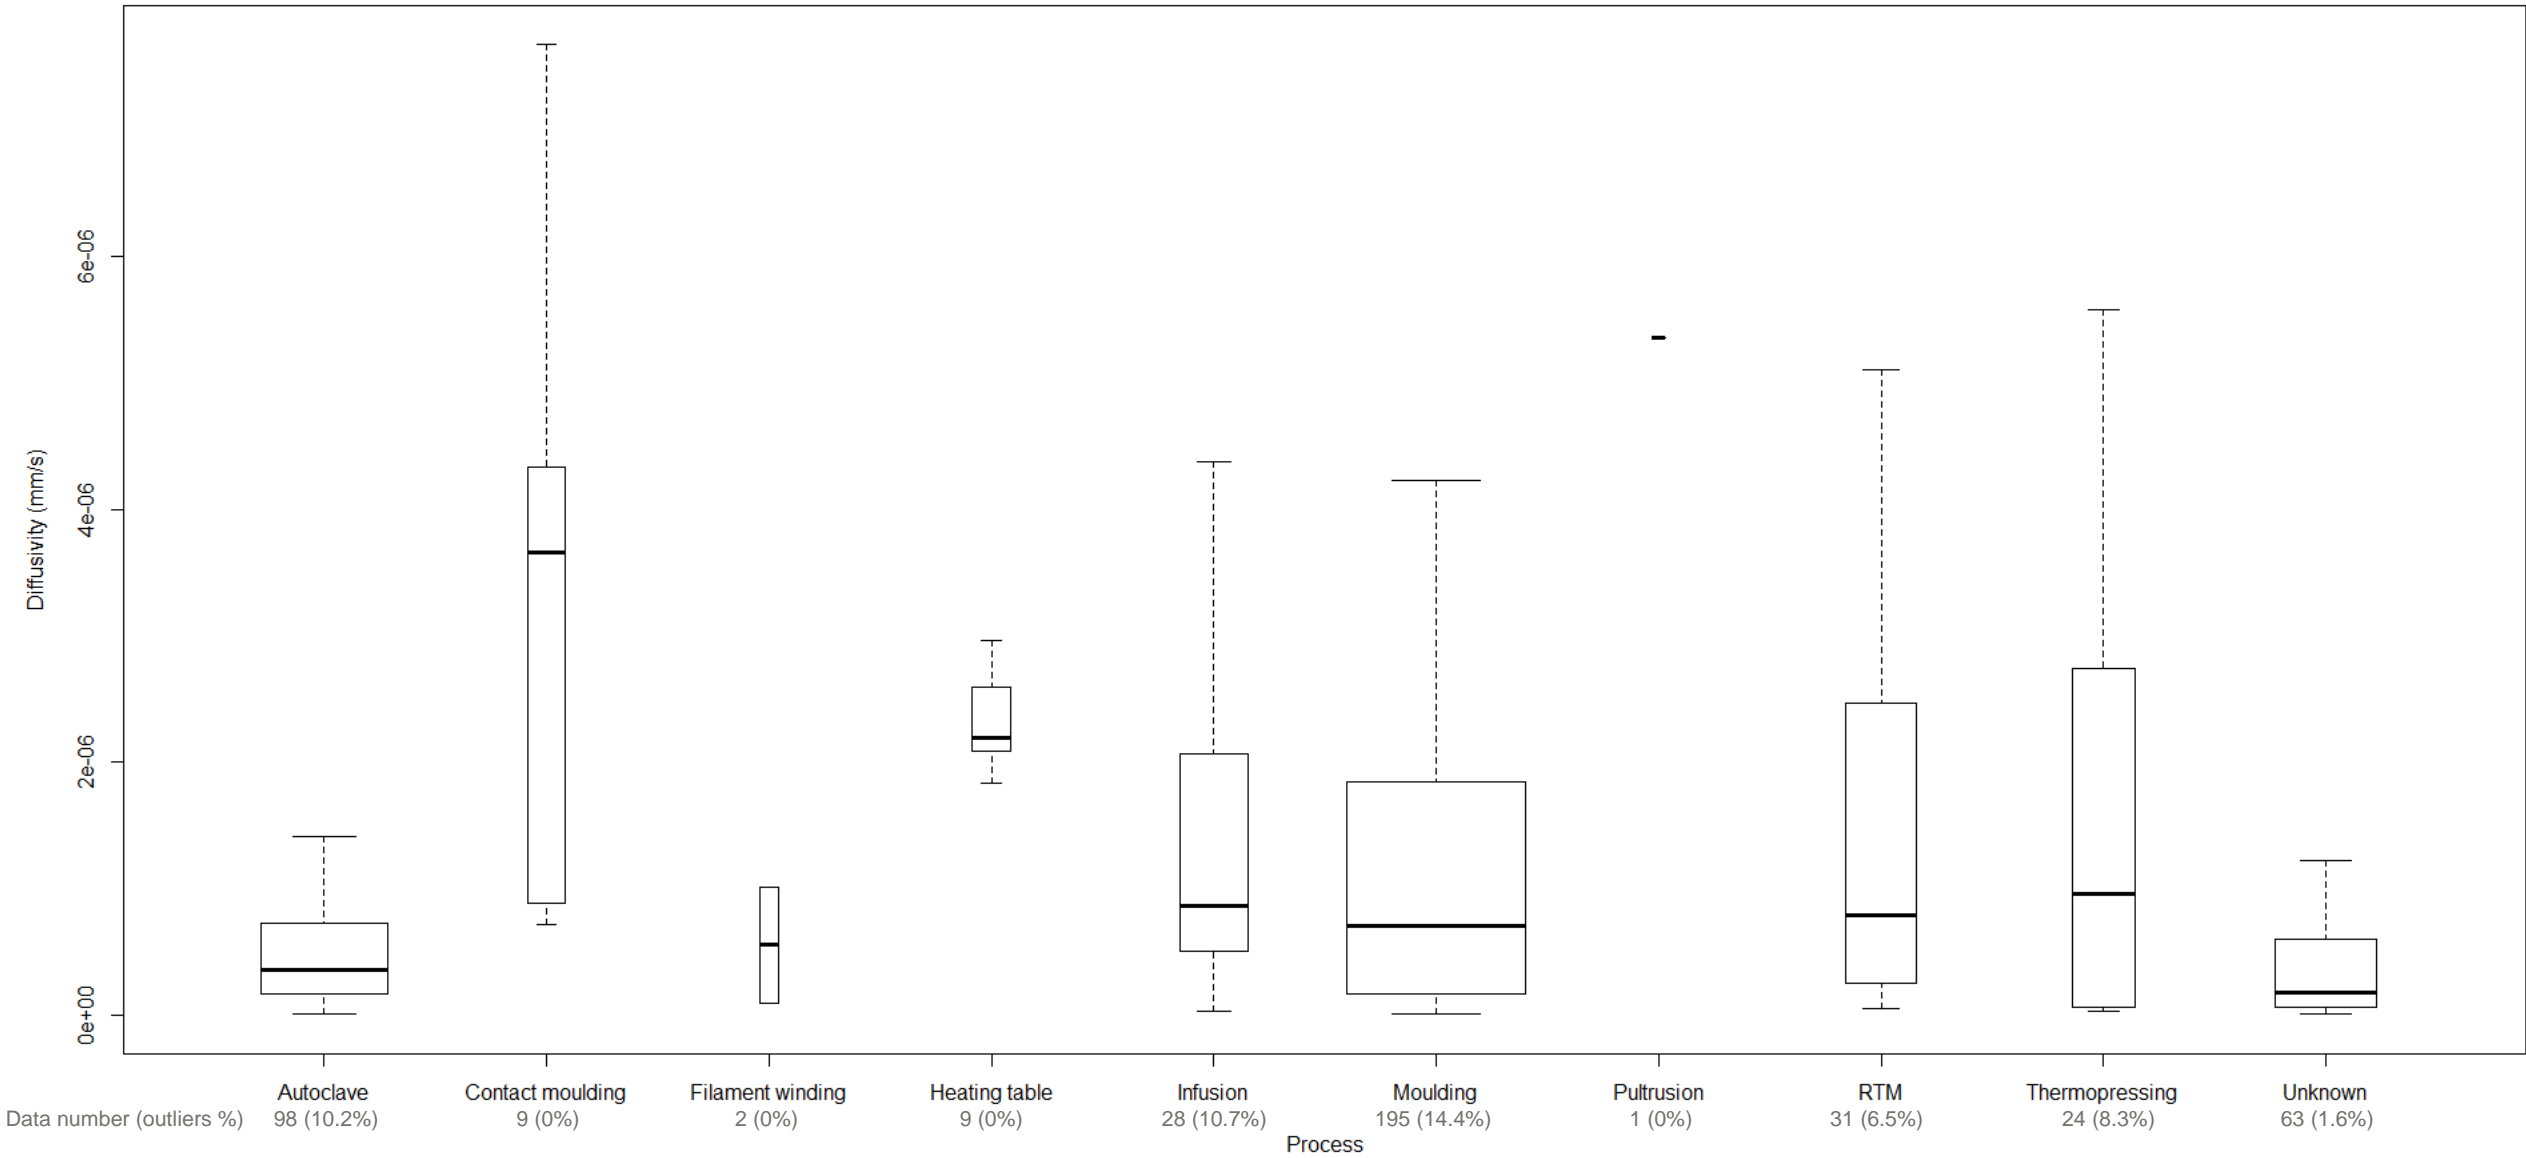



**Figure S16.** Boxplots of  $t_{sat}/h$  as a function of process.

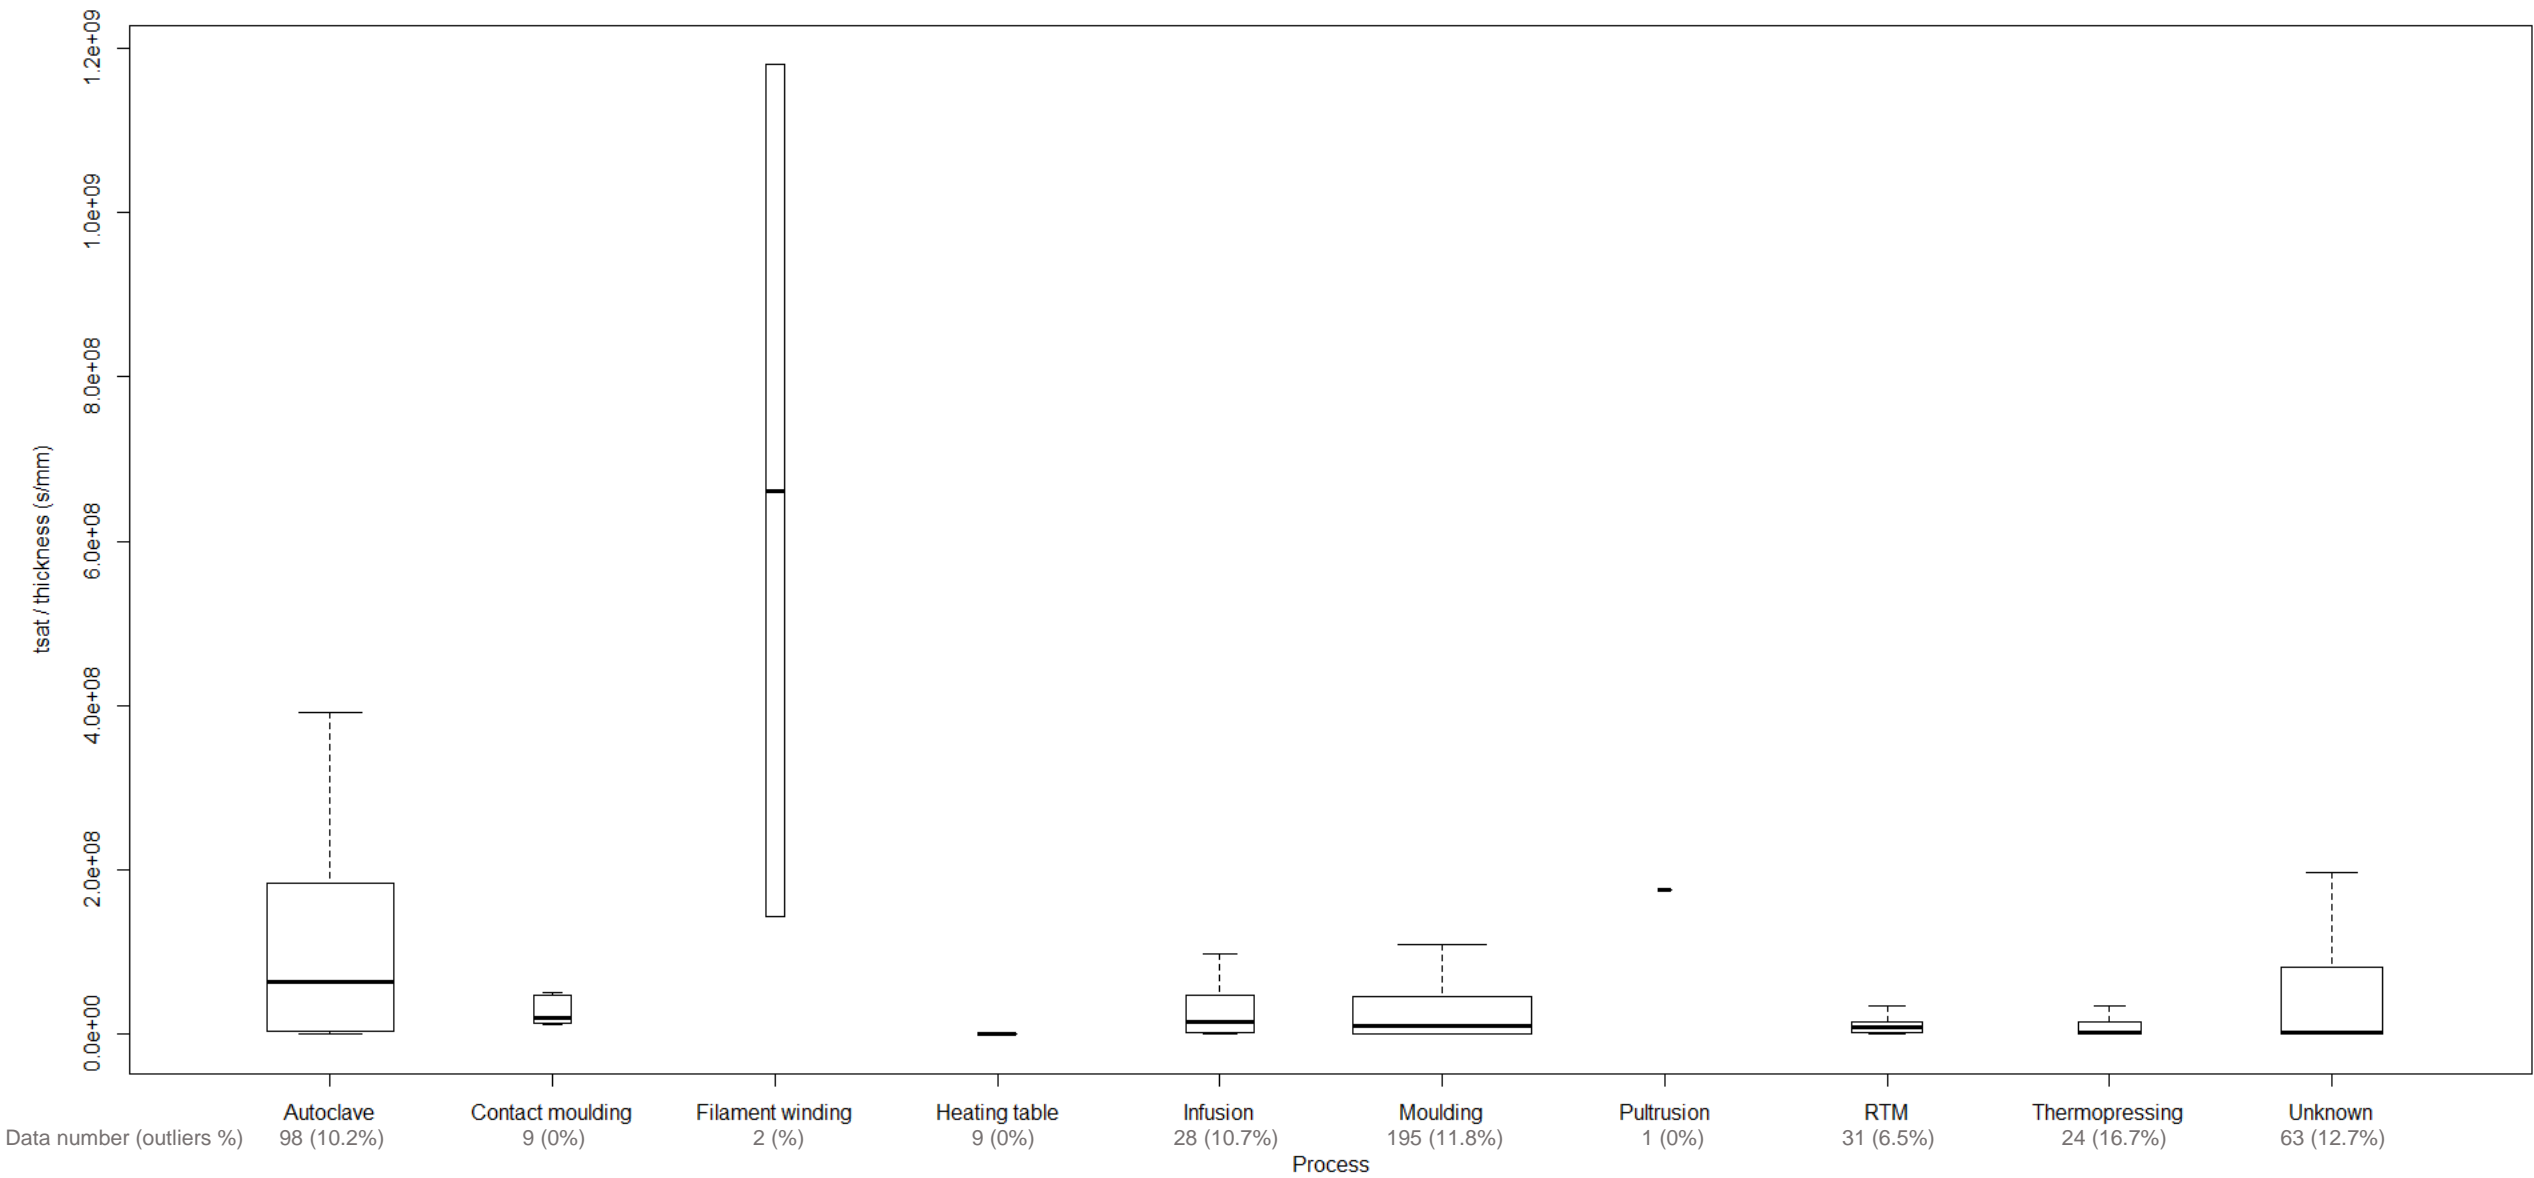

**Figure S17.** Boxplots of  $M_{sat}$  as a function of process.

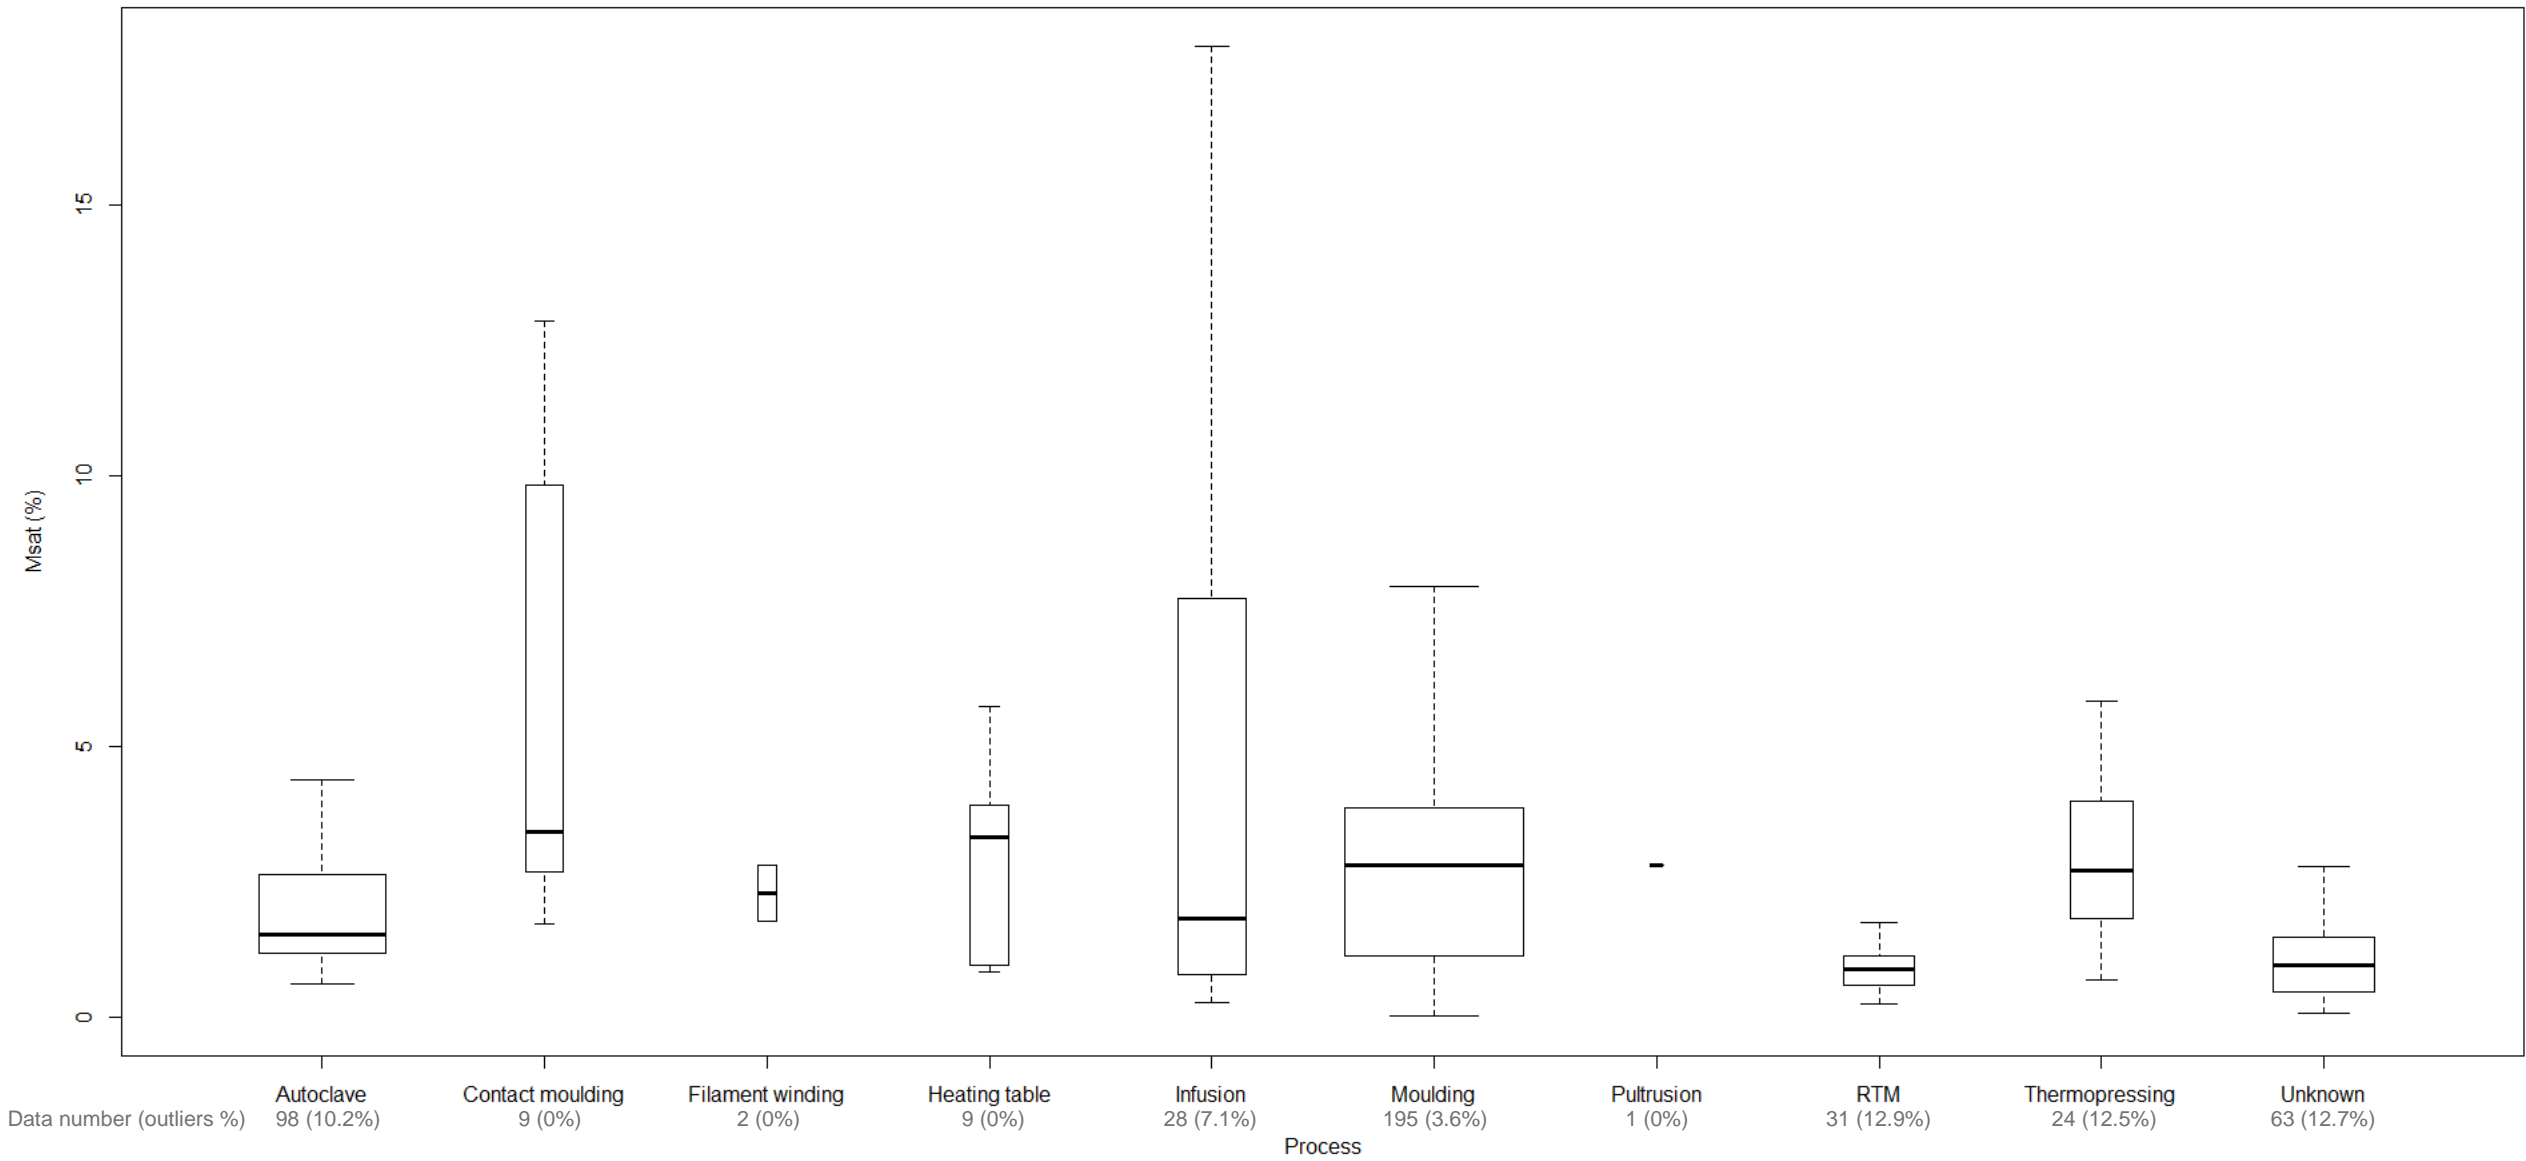

**Figure S18.** Boxplots of  $D$  as a function of conditioning.

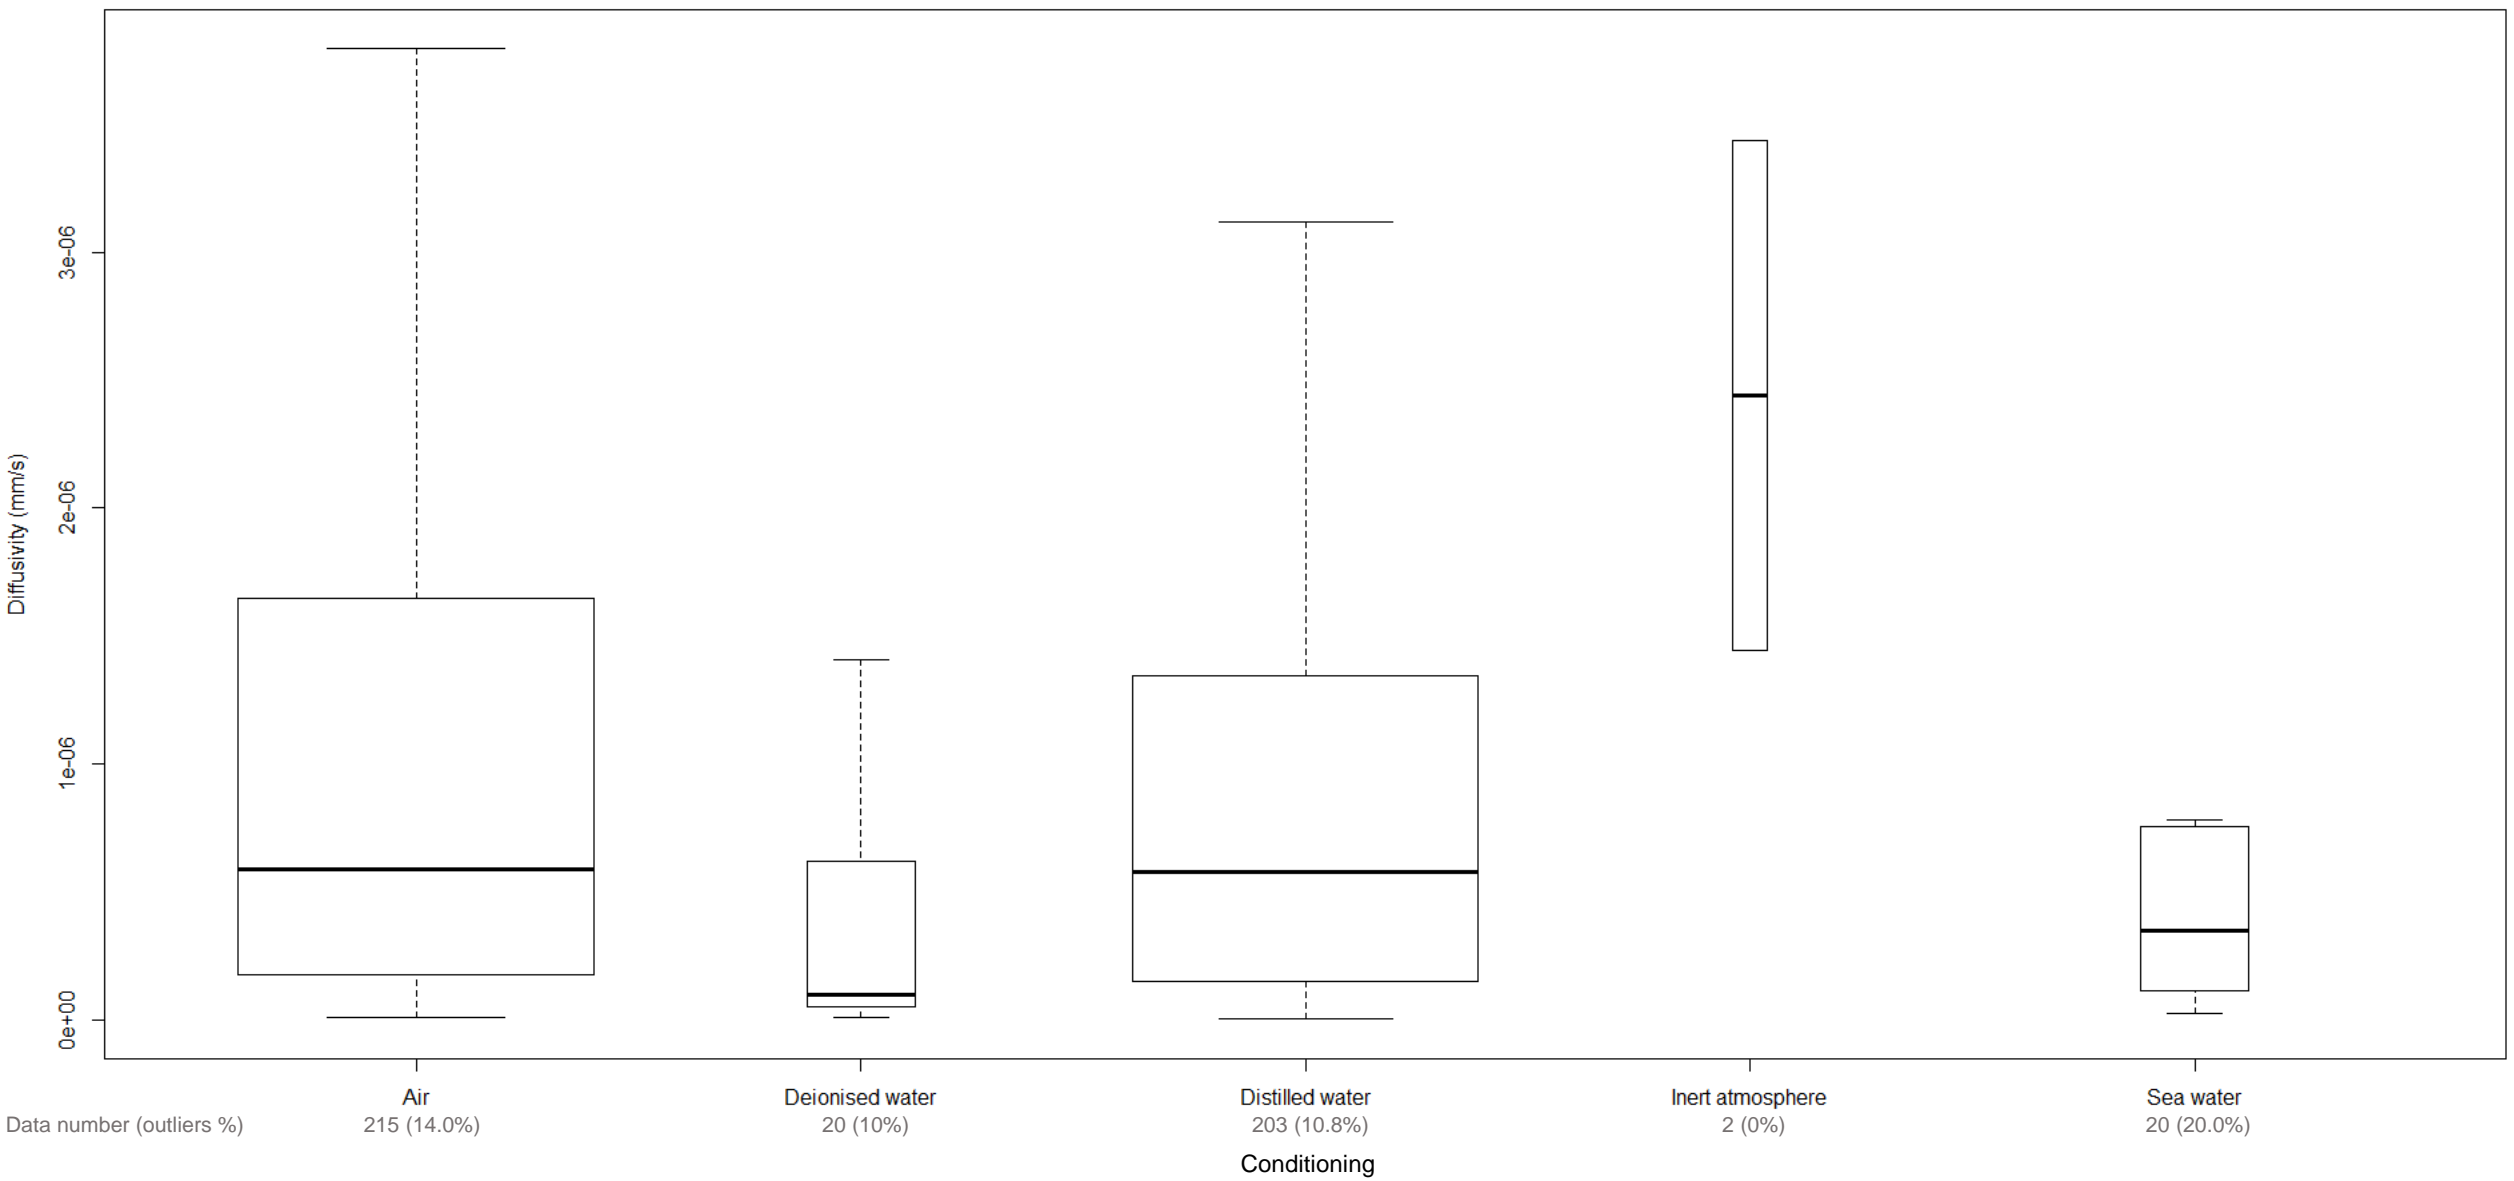

**Figure S19.** Boxplots of  $t_{sat}/h$  as a function of conditioning.

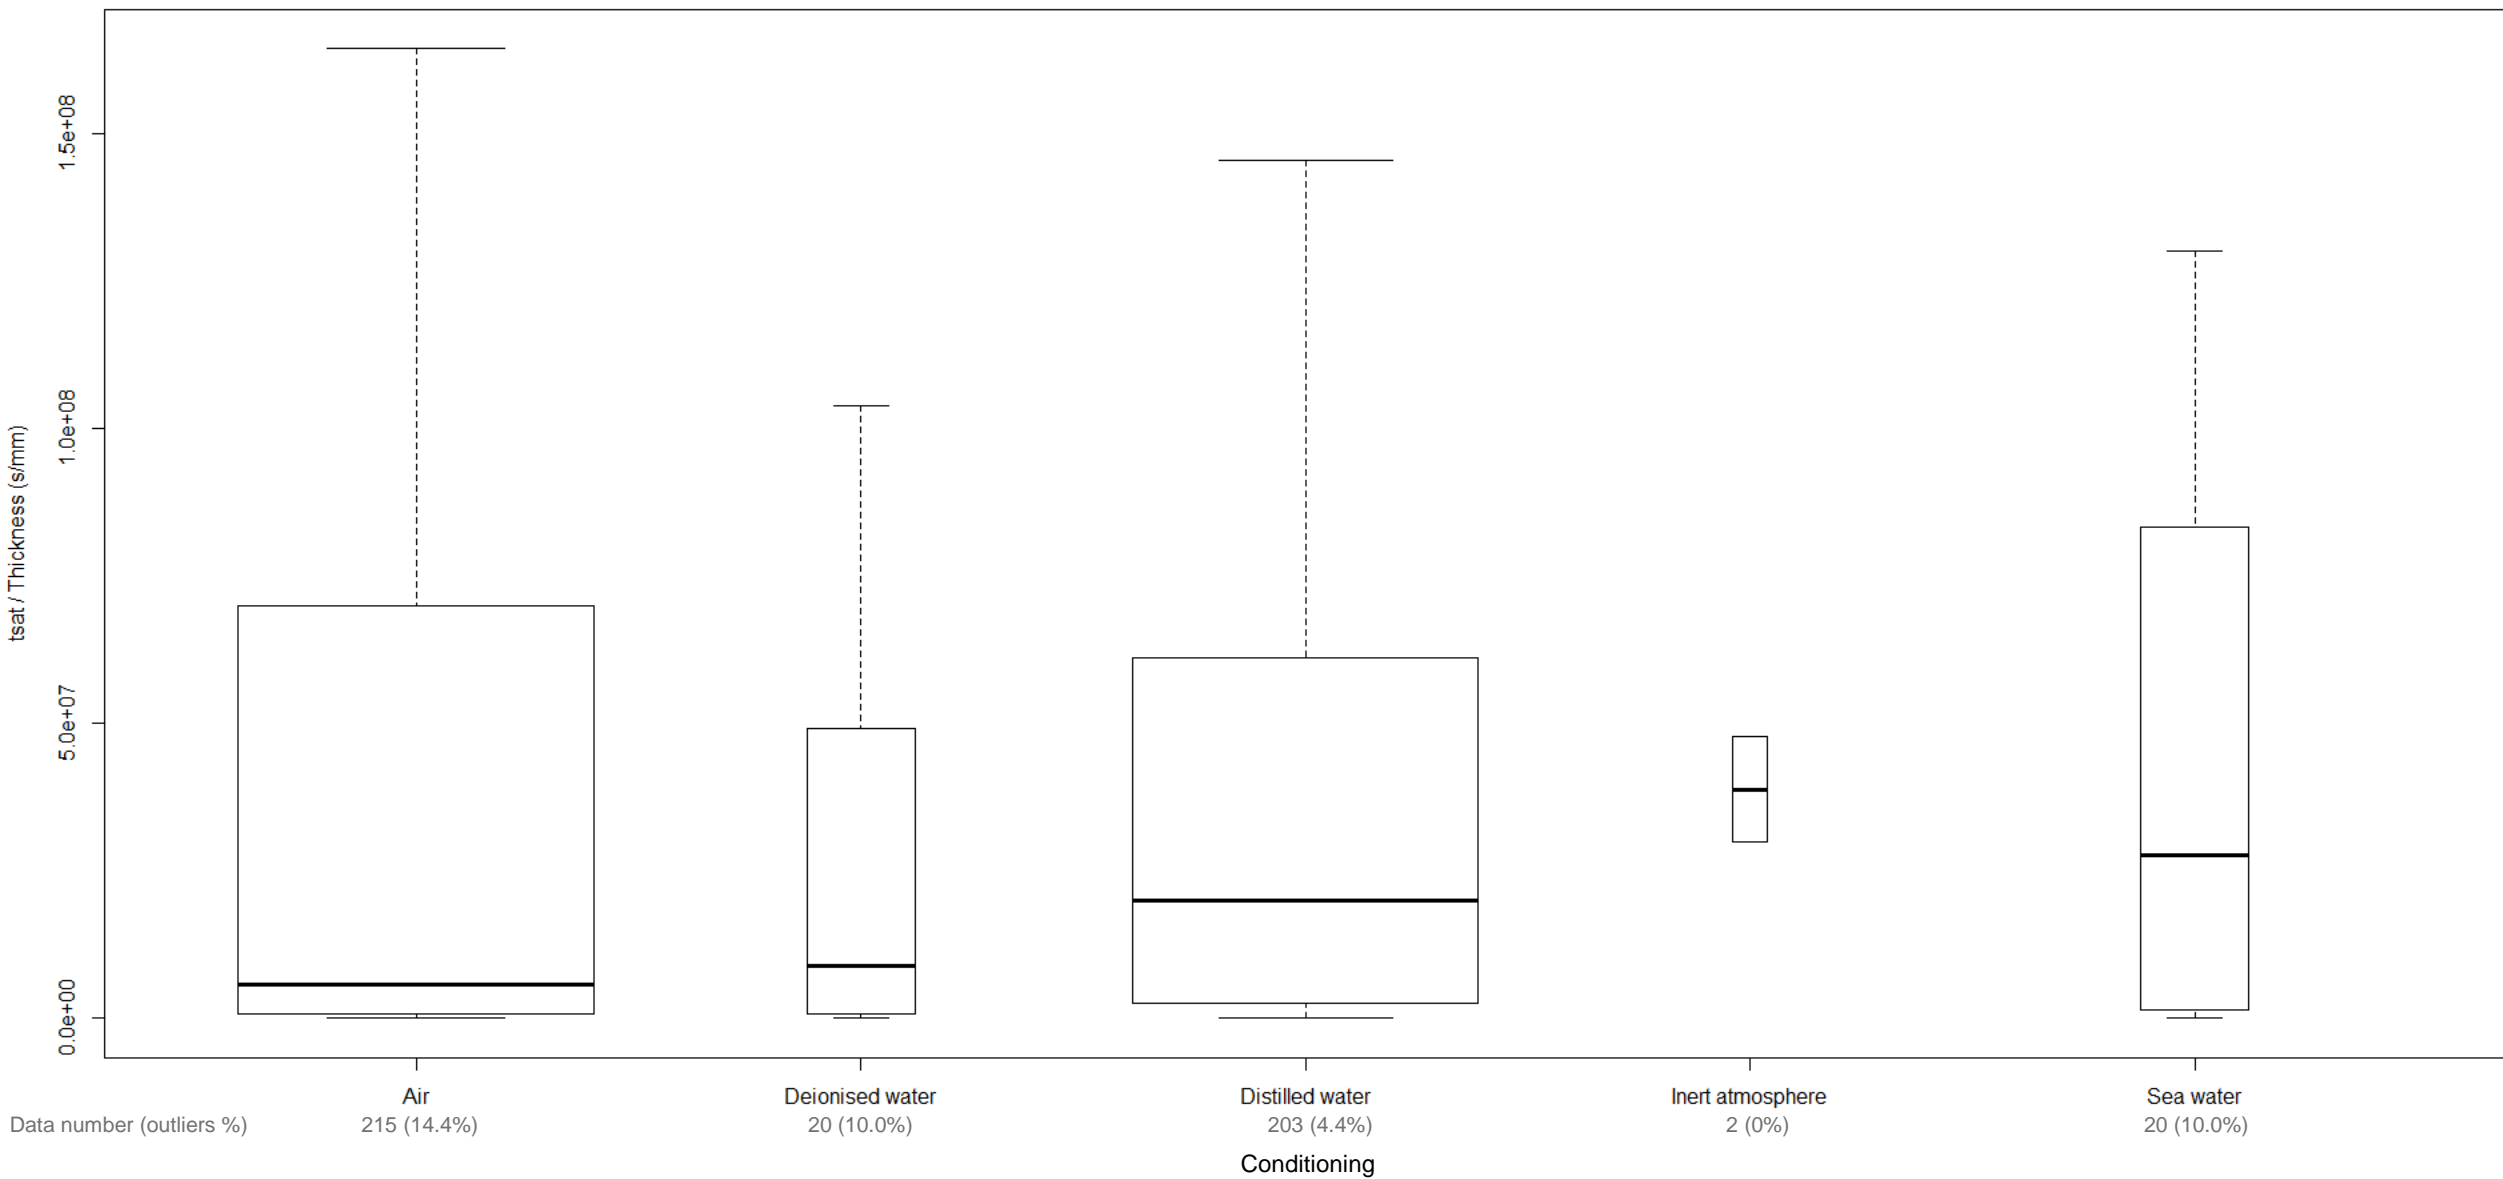

**Figure S20.** Boxplots of  $M_{sat}$  as a function of conditioning.

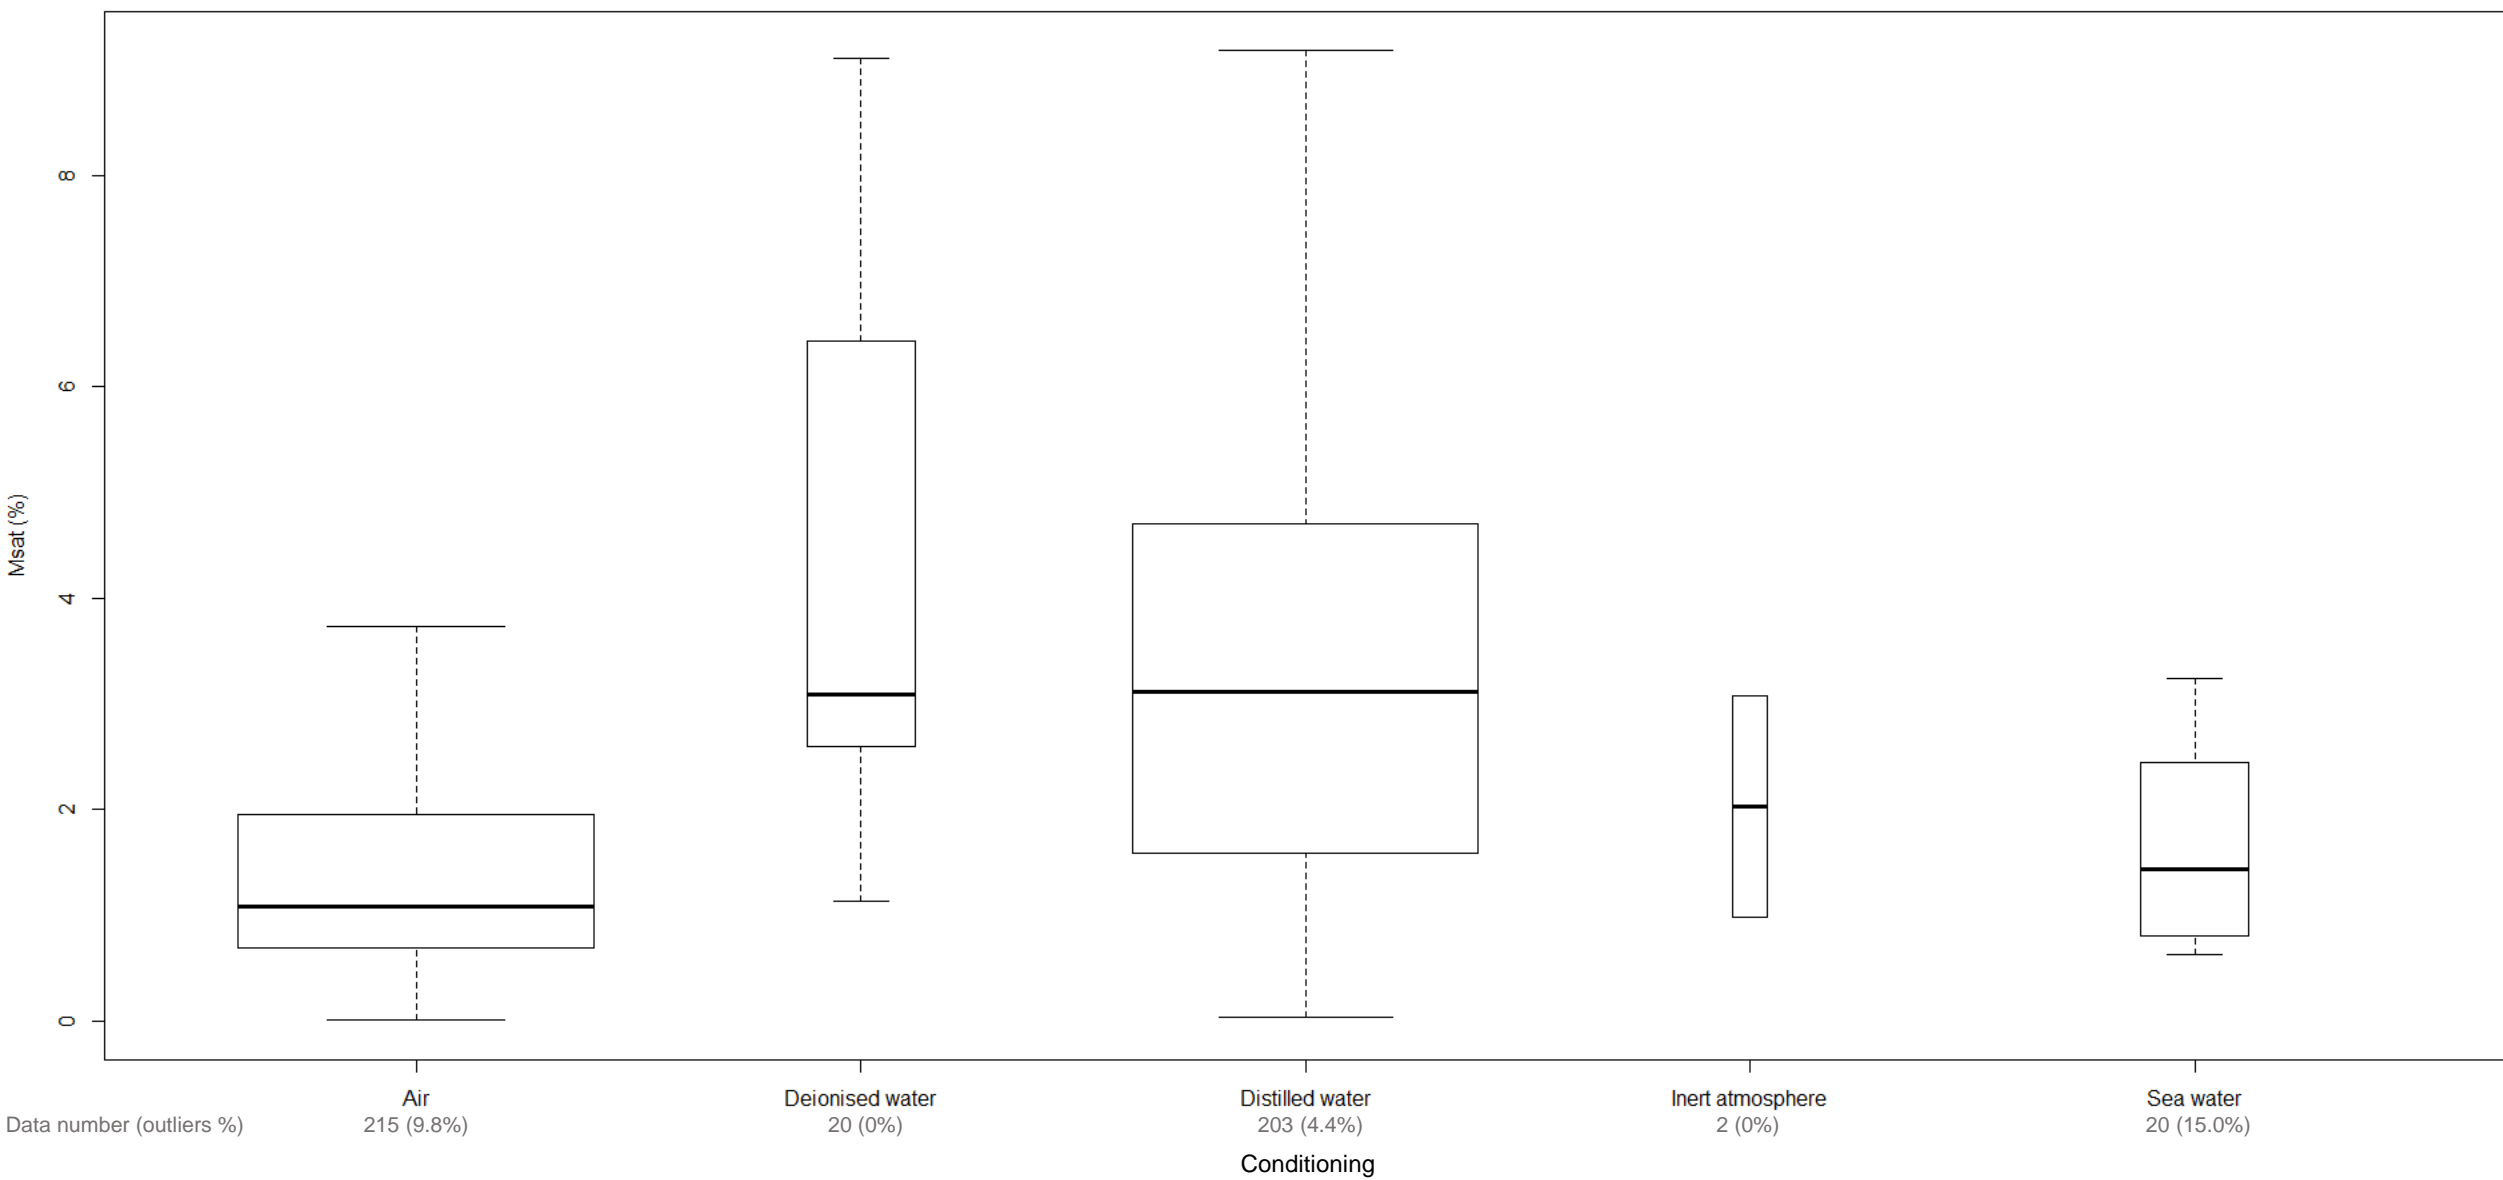

**Figure S21.** Fick resins' PCA: representation quality of the study variables on the principal components and correlation circles.

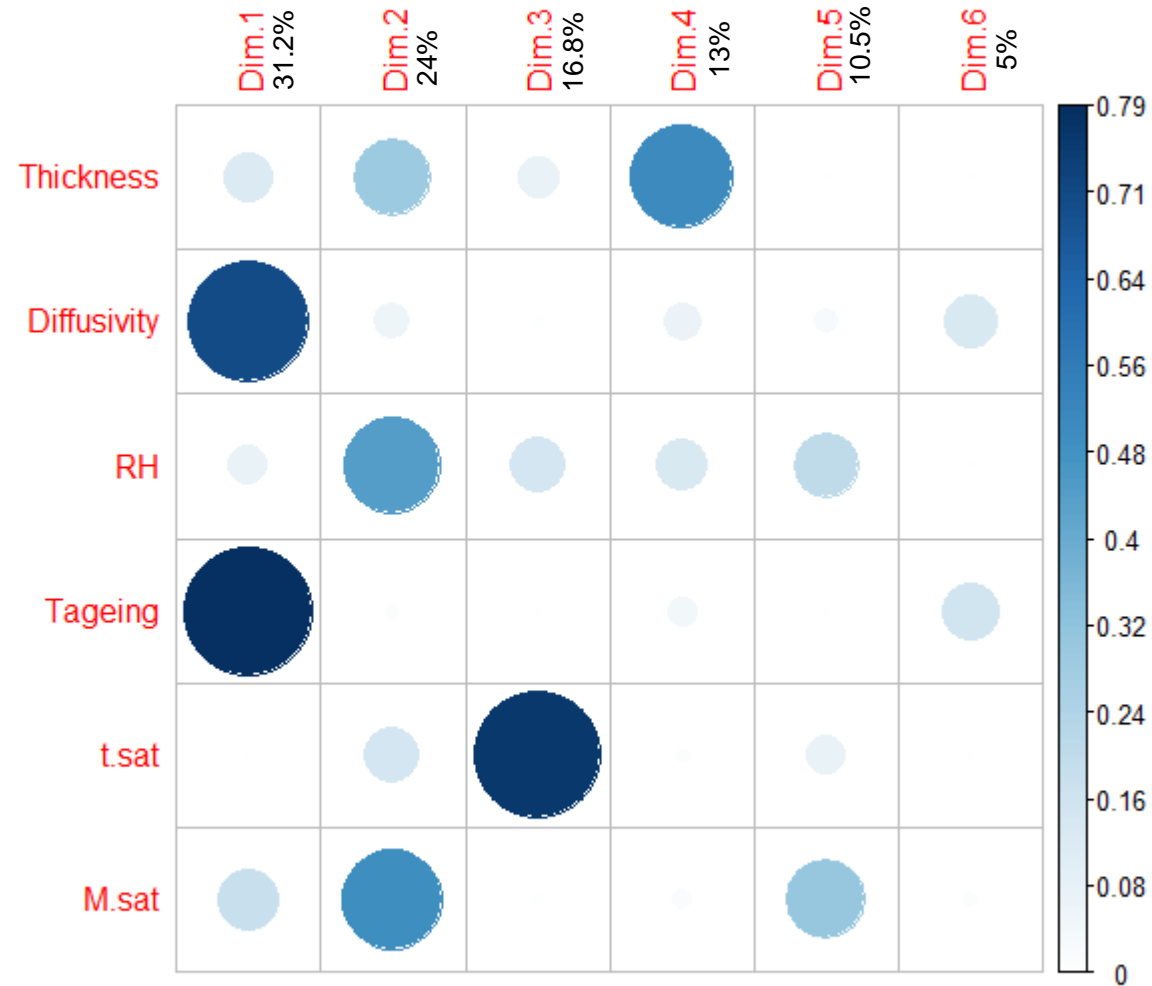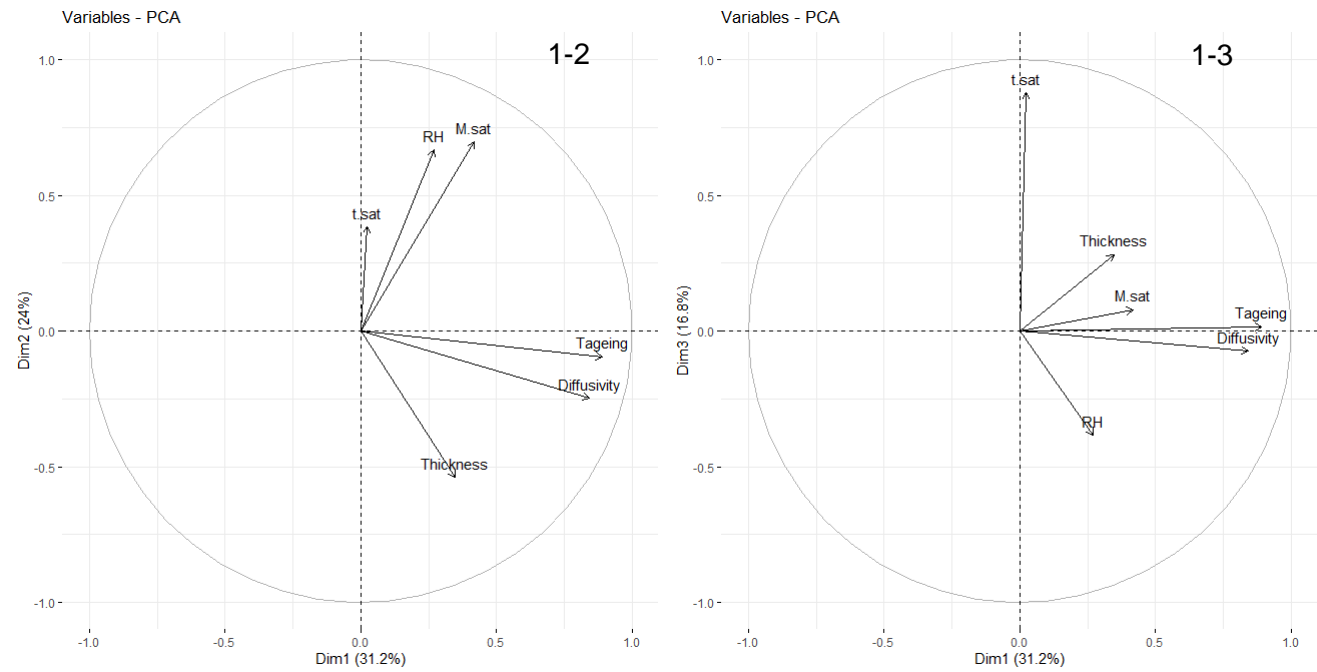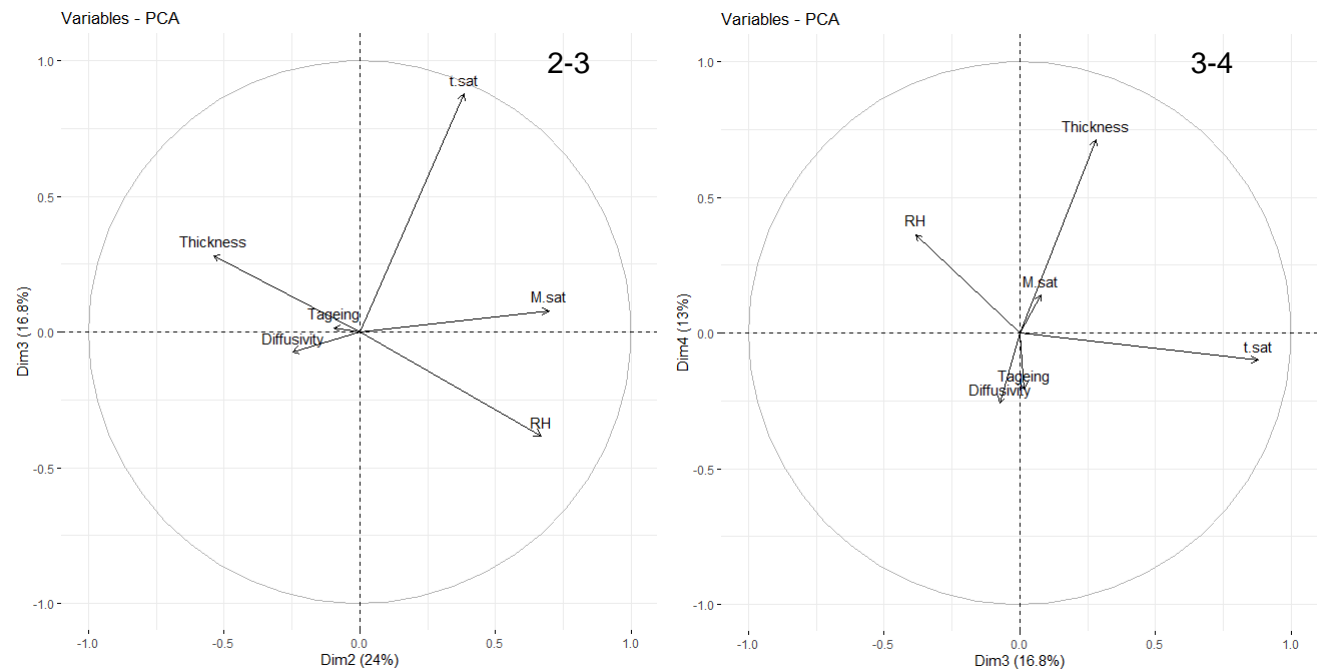

**Figure S22.** Fick composites' PCA: representation quality of the study variables on the principal components and correlation circles.

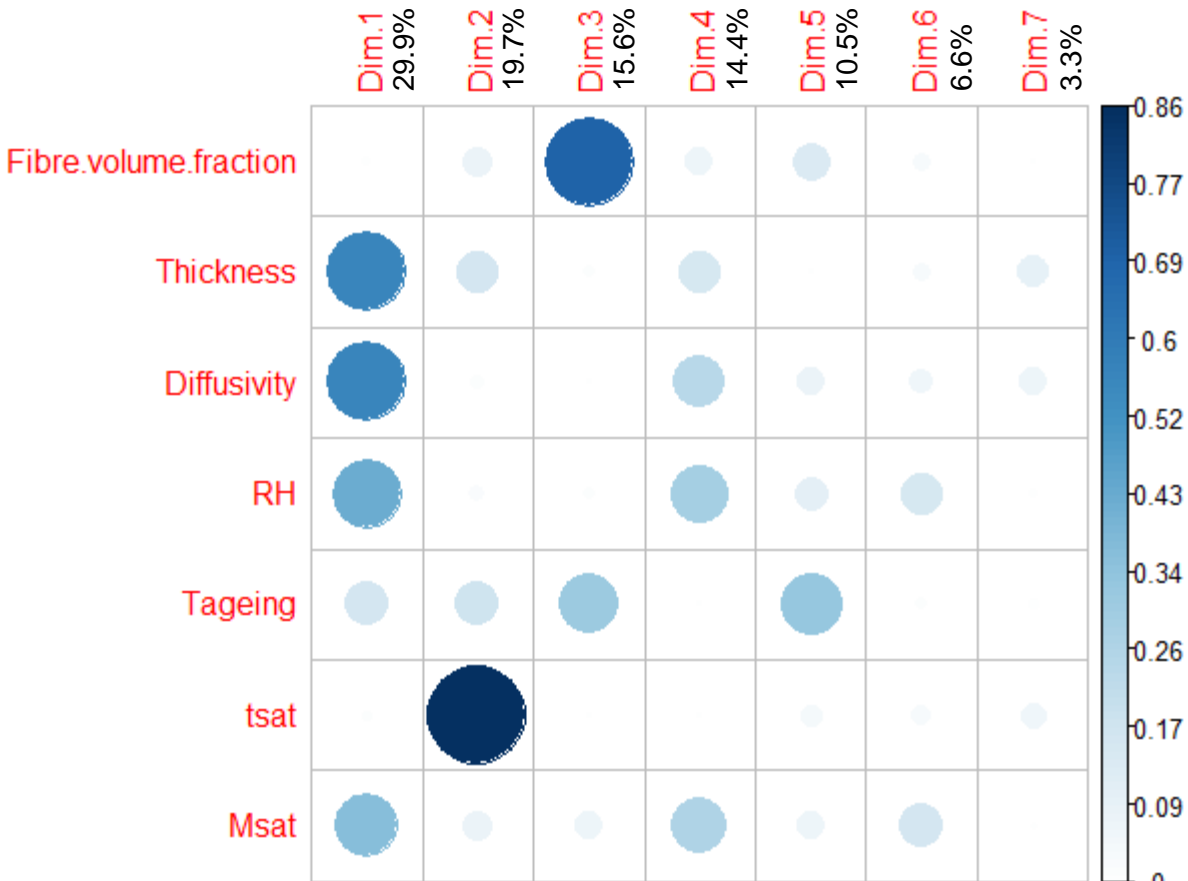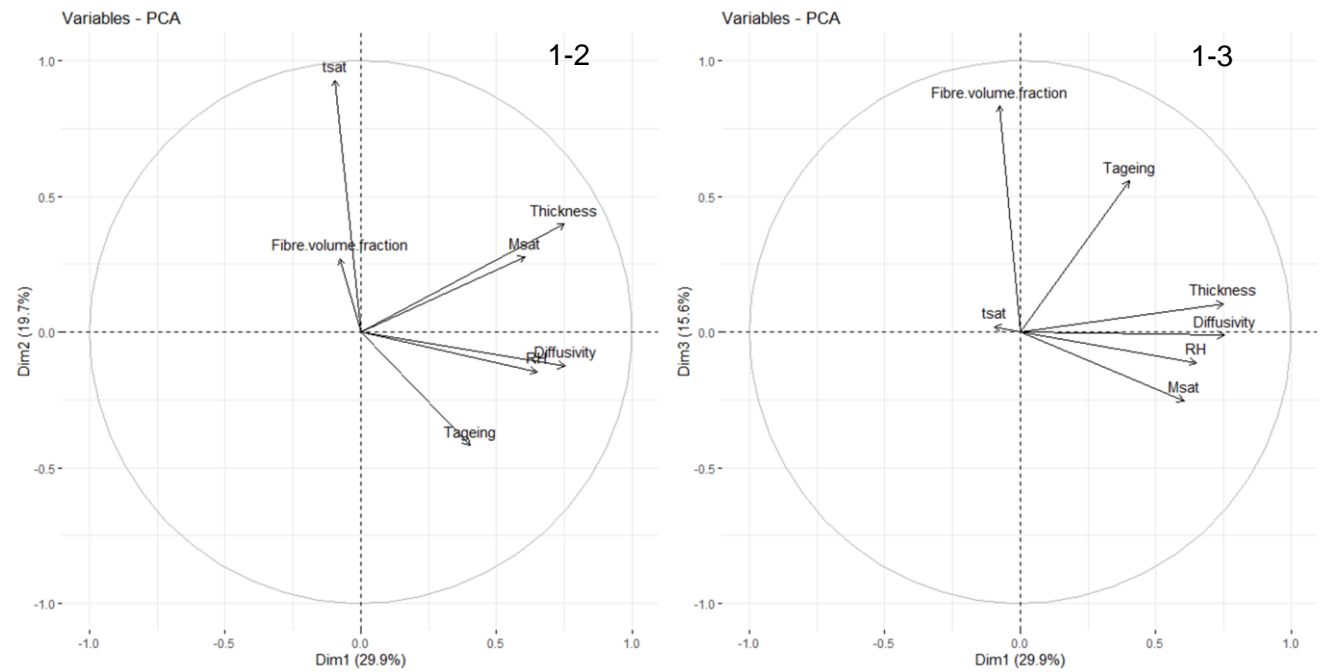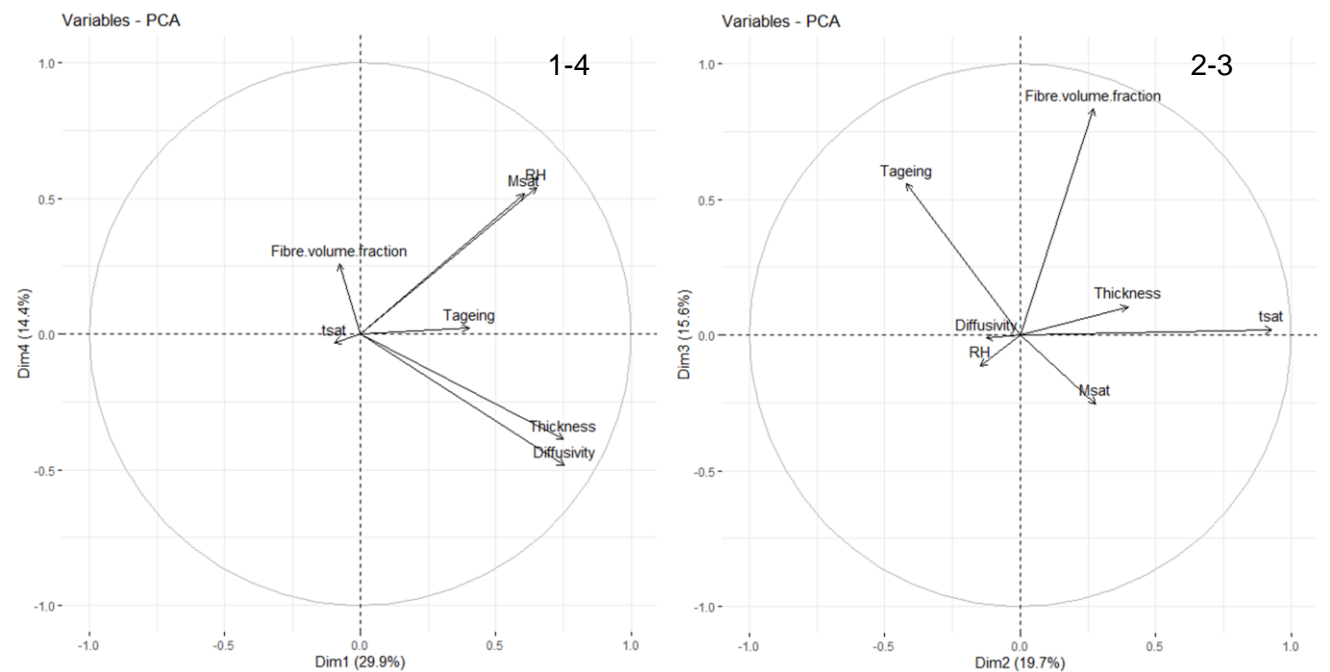

**Figure S23.** Dual resins' PCA: representation quality of the study variables on the principal components and correlation circles.

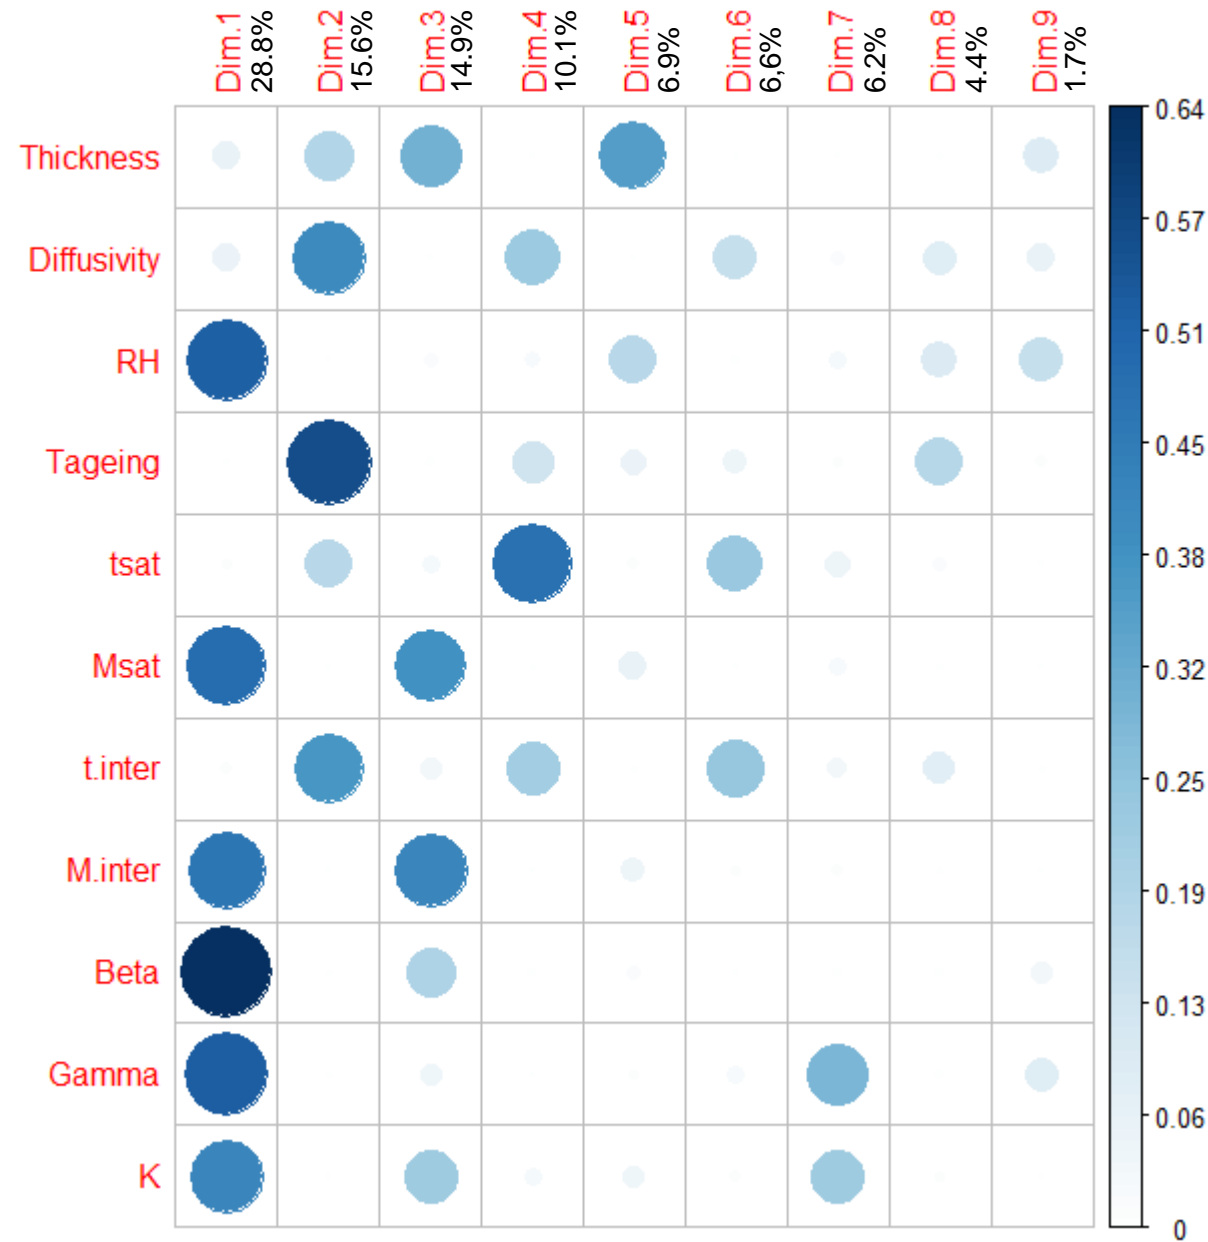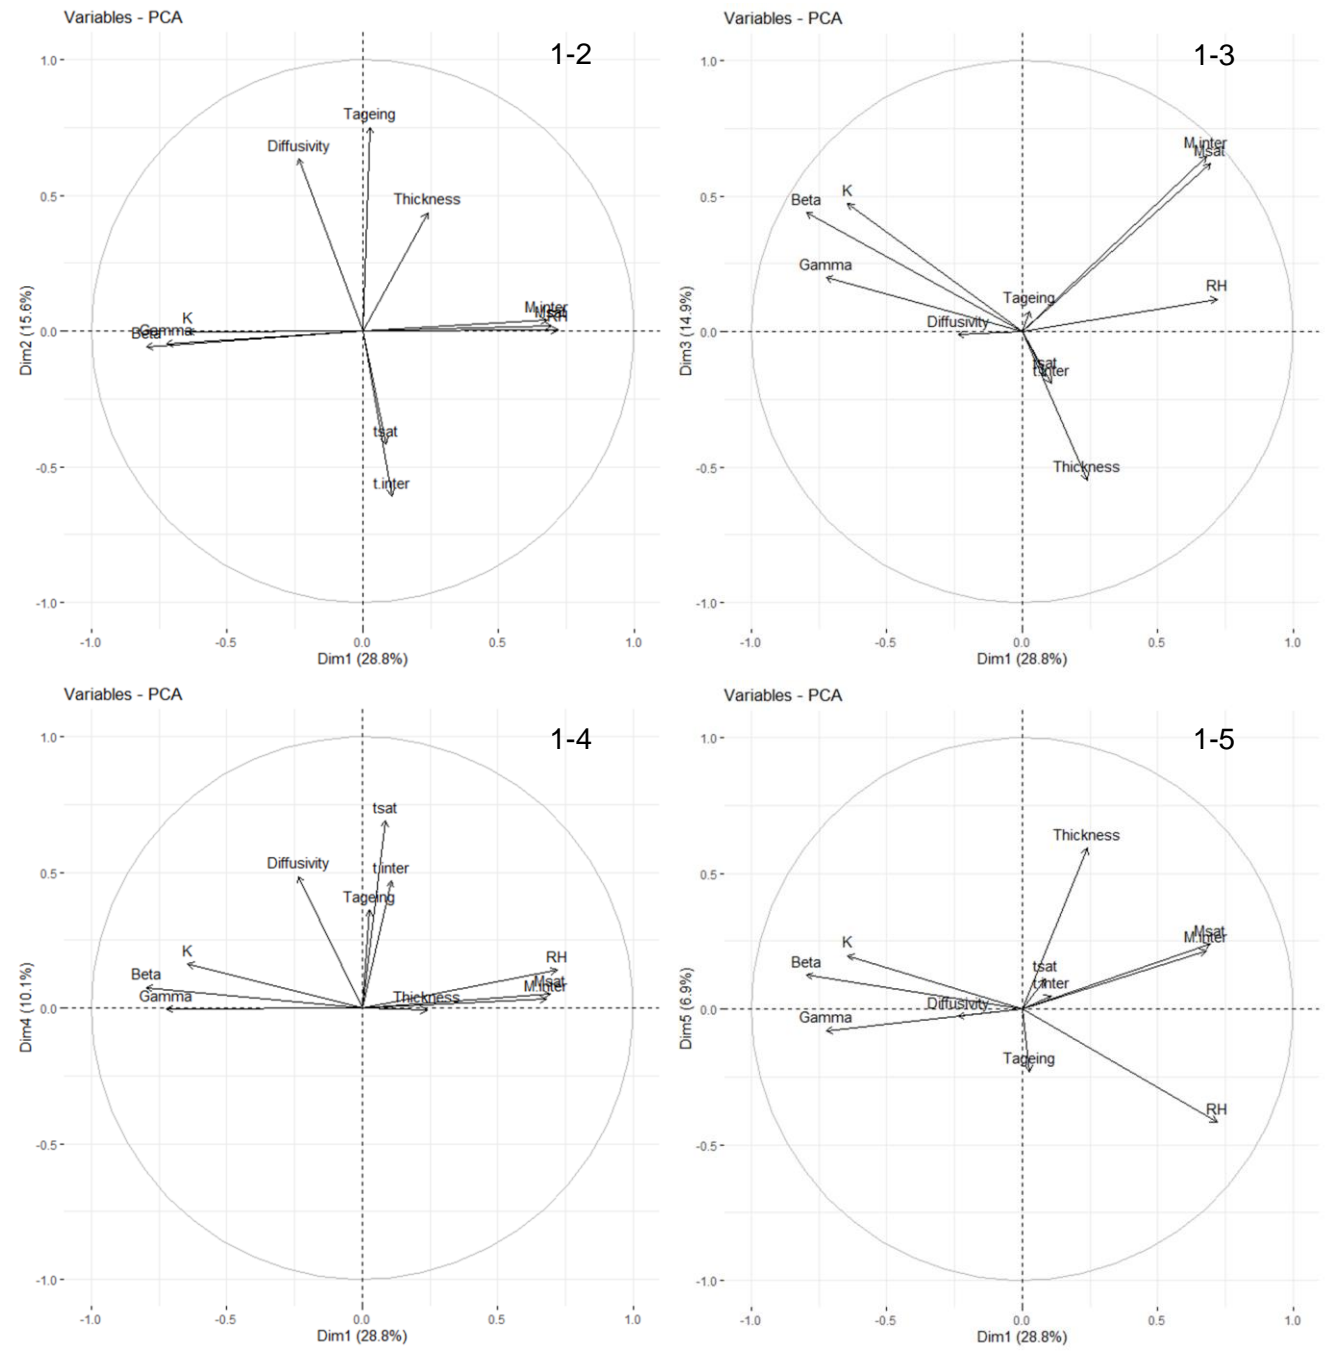



**Figure S24.** Dual composites' PCA: representation quality of the study variables on the principal components and correlation circles.

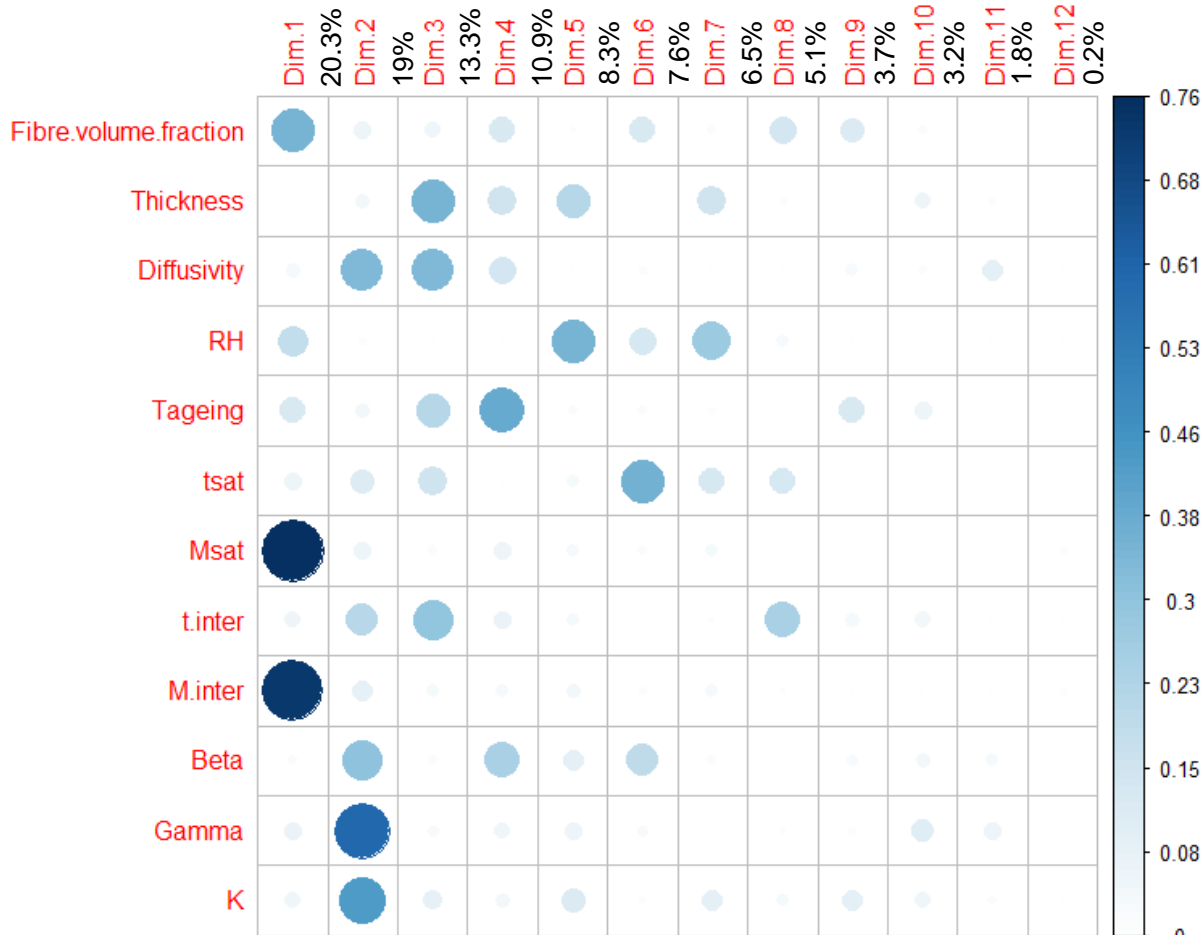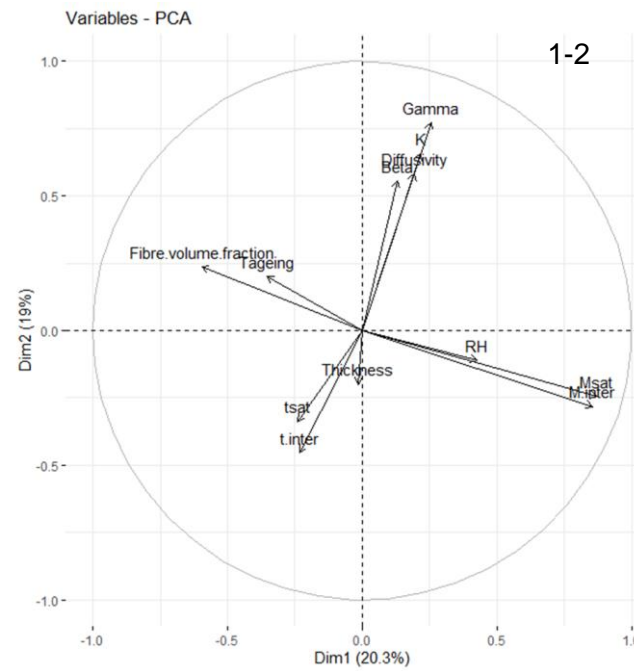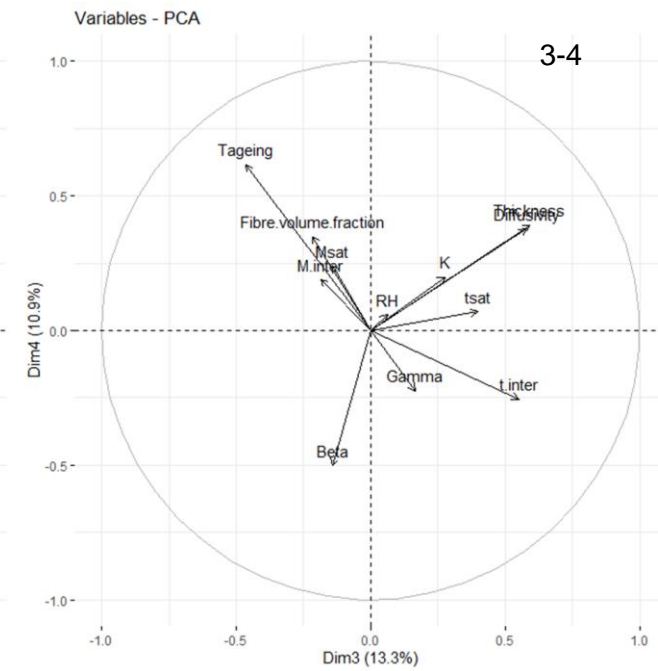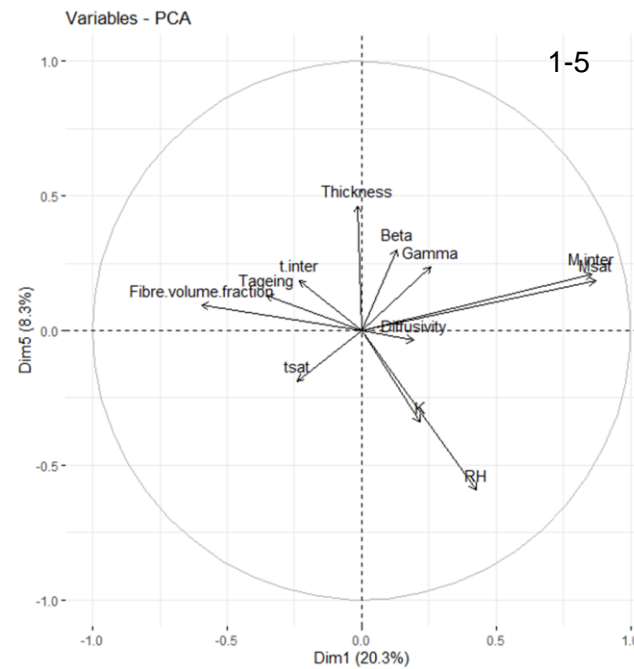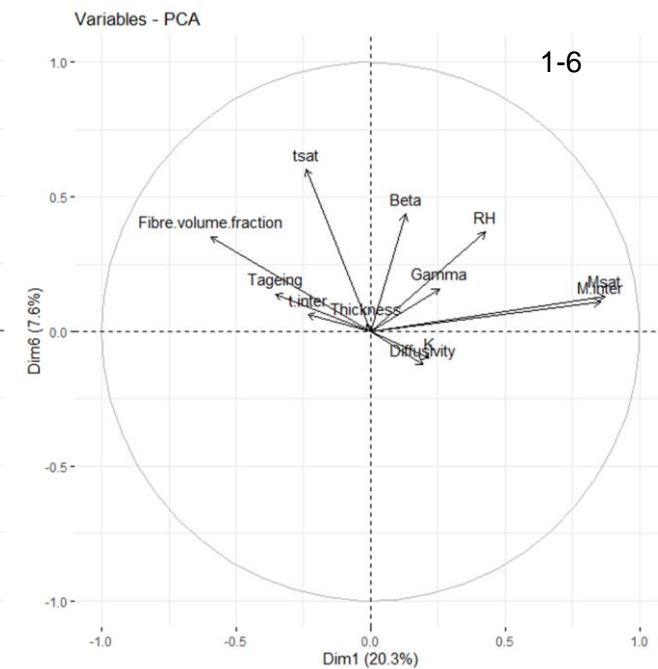

Supplement: s1 [file s1]
